# Supplementary material for: Data-driven cluster analysis identifies distinct types of metabolic dysfunction-associated steatotic liver disease
Source: PubMed Central journal article supplement — Nat Med. 2024 Dec 9;30(12):3624–33. doi: 10.1038/s41591-024-03283-1 (PMC11645276; doi:10.1038/s41591-024-03283-1), 2024-12-09
Supplement: 41591_2024_3283_MOESM1_ESM.pdf [file 41591_2024_3283_MOESM1_ESM.pdf]

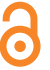

---

# Data-driven cluster analysis identifies distinct types of metabolic dysfunction-associated steatotic liver disease

---

In the format provided by the authors and unedited

---

## **Data-driven cluster analysis identifies distinct types of metabolic dysfunction-associated steatotic liver disease**

**Supplementary Table 1: The liver gene expression and plasma metabolites with significant differences between the cardiometabolic and liver-specific clusters (A), cardiometabolic and control (B), and liver-specific and (C). Metabolites with significant differences between the cardiometabolic and liver-specific clusters (D), cardiometabolic and control (E), and liver-specific and CTRL (F). Molecular features that were differentially expressed between type 2 diabetes and non-T2D groups, and between cardiometabolic and control clusters (G).**

**Supplementary Table 2: Definition of self-reported history of liver disease, cardiovascular disease, and type 2 diabetes (UK Biobank data-field 20002) and ICD-10 codes used to define liver disease, cardiovascular disease, and type 2 diabetes.**

**Supplementary Table 1 : The liver gene expression with significant differences between the cardiometabolic and liver-specific clusters (A), cardiometabolic and control clusters (B), and liver-specific and control clusters (C). Gene expression differential analysis across clusters was conducted using moderated t-tests. Statistical significance was assigned to differences where p-values, adjusted for multiple comparisons using the Benjamini-Hochberg method to control the False Discovery Rate, were below 0.05 and the absolute value of log<sub>2</sub> fold change was greater than 0.26. Metabolites with significant differences between the cardiometabolic and liver-specific clusters (D), cardiometabolic and control clusters (E), and liver-specific and control clusters (F). Metabolite differential analysis across clusters was conducted using moderated t-tests, excluding xenobiotics. Statistical significance was assigned to differences where p-values, adjusted for multiple comparisons using the Benjamini-Hochberg method to control the False Discovery Rate, were below 0.05 and the absolute value of log<sub>2</sub> fold change was greater than 0.26. Molecular features that were differentially expressed between type 2 diabetes and non-T2D groups, and between cardiometabolic and control clusters (G).**

| Cluster cardiometabolic vs Cluster Liver specific (A) |         |           |
|-------------------------------------------------------|---------|-----------|
| Liver gene                                            | logFC   | adj.P.Val |
| CHI3L1                                                | 2,69765 | 0,00011   |
| LGALS4                                                | 1,3935  | 0,00023   |
| HMGCS1                                                | 1,35382 | 0,0005    |
| MVD                                                   | 1,20644 | 0,00003   |
| LDLR                                                  | 1,09458 | 0,00506   |
| CYP51A1                                               | 1,07094 | 0,00006   |
| ACAT2                                                 | 0,91356 | 0,00506   |
| DCPS                                                  | 0,88803 | 0,00006   |
| DHCR7                                                 | 0,83545 | 0,01948   |
| NSDHL                                                 | 0,82669 | 0,01418   |
| SC5D                                                  | 0,79568 | 0,00207   |
| SLC25A18                                              | 0,79217 | 0,00108   |
| LSS                                                   | 0,79216 | 0,00023   |
| ERG28                                                 | 0,77461 | 0,01127   |
| CAPN12                                                | 0,75505 | 0,00084   |
| RETREG1                                               | 0,74751 | 0,02853   |
| ALDOC                                                 | 0,54497 | 0,0164    |
| ACLY                                                  | 0,52824 | 0,03395   |
| CPT1B                                                 | 0,52063 | 0,02902   |
| SYT17                                                 | 0,51289 | 0,02245   |
| POU6F1                                                | 0,50896 | 0,02256   |
| EXT1                                                  | 0,449   | 0,02898   |
| RRM2B                                                 | 0,41109 | 0,02902   |

| DDB2                                                  | 0,3911       | 0,02719          |
|-------------------------------------------------------|--------------|------------------|
| MAP3K6                                                | 0,37267      | 0,02189          |
| HNRNPH3                                               | -0,3932      | 0,00356          |
| RAI14                                                 | -0,4747      | 0,04647          |
| A1CF                                                  | -0,5391      | 0,01127          |
| DPP4                                                  | -0,547       | 0,00305          |
| ZG16                                                  | -0,579       | 0,0247           |
| RGS5                                                  | -0,8278      | 0,00305          |
| TCP10L2                                               | -0,8754      | 0,00086          |
| ETNPPL                                                | -0,8899      | 0,03578          |
| POSTN                                                 | -0,9896      | 0,00677          |
| FAM151A                                               | -1,3683      | 0,00084          |
| <b>Cluster cardiometabolic vs Cluster control (B)</b> |              |                  |
| <b>Liver gene</b>                                     | <b>logFC</b> | <b>adj.P.Val</b> |
| CHI3L1                                                | 3,27236      | 0                |
| EIF1AY                                                | 1,52125      | 0,00058          |
| HMGCS1                                                | 1,41908      | 0                |
| LGALS4                                                | 1,24443      | 0                |
| AKR1B10                                               | 1,21135      | 0                |
| SPP1                                                  | 1,13682      | 0                |
| MVD                                                   | 1,11938      | 0                |
| SCD                                                   | 1,007        | 0,00001          |
| DEFB1                                                 | 0,99607      | 0                |
| LDLR                                                  | 0,96179      | 0                |
| LPL                                                   | 0,94914      | 0                |
| OLFM2                                                 | 0,94256      | 0,00002          |
| SNORA14A                                              | 0,91952      | 0,00059          |
| UTY                                                   | 0,90849      | 0,0007           |
| SULF2                                                 | 0,90487      | 0                |
| LINC01554                                             | 0,86349      | 0,03627          |
| CYP51A1                                               | 0,86273      | 0                |
| INSIG1                                                | 0,86129      | 0                |
| NSDHL                                                 | 0,85209      | 0                |
| HKDC1                                                 | 0,84117      | 0,00011          |
| DTNA                                                  | 0,83339      | 0                |
| IL32                                                  | 0,82629      | 0,00005          |
| CSTA                                                  | 0,82119      | 0,00001          |
| HSPA4L                                                | 0,81489      | 0                |
| CAPN12                                                | 0,79988      | 0                |

|              |         |         |
|--------------|---------|---------|
| CXCL9        | 0,79753 | 0,01269 |
| DHCR7        | 0,79139 | 0       |
| KDM5D        | 0,78481 | 0,00086 |
| PTGDS        | 0,78331 | 0,00454 |
| ITGBL1       | 0,77501 | 0       |
| FABP5        | 0,77165 | 0       |
| ANXA2P2      | 0,77046 | 0       |
| CXCL10       | 0,76675 | 0,00036 |
| VCAN         | 0,76582 | 0       |
| CCND1        | 0,76422 | 0       |
| CCL20        | 0,75162 | 0,00194 |
| LUM          | 0,74679 | 0,01151 |
| RPS27L       | 0,74557 | 0       |
| STMN2        | 0,73492 | 0       |
| ERG28        | 0,72243 | 0       |
| TYMS         | 0,71192 | 0       |
| ZMAT3        | 0,71036 | 0       |
| SC5D         | 0,7081  | 0       |
| LSS          | 0,68554 | 0       |
| ACAT2        | 0,64739 | 0,00024 |
| KDEL3        | 0,64206 | 0,00409 |
| USP9Y        | 0,636   | 0,01659 |
| ACLY         | 0,6324  | 0       |
| ANKRD18B     | 0,62674 | 0,01216 |
| ANKRD18A     | 0,62674 | 0,01216 |
| PYGB         | 0,61888 | 0       |
| DCPS         | 0,61099 | 0       |
| TIMP1        | 0,61089 | 0,001   |
| PURPL        | 0,60657 | 0,00068 |
| ZFP36        | 0,59077 | 0,03646 |
| SNX10        | 0,59016 | 0,00049 |
| HSD17B7P2    | 0,58025 | 0,00013 |
| RETREG1      | 0,56104 | 0,00065 |
| ALDOC        | 0,55794 | 0       |
| ARHGAP10     | 0,55175 | 0,01153 |
| TNNC1        | 0,54168 | 0,00024 |
| DDB2         | 0,5349  | 0       |
| PODN         | 0,52576 | 0,01469 |
| LOC101927136 | 0,52222 | 0,00001 |
| PRKAA2       | 0,51863 | 0,00082 |
| FDFT1        | 0,51006 | 0       |

|             |         |         |
|-------------|---------|---------|
| AKR1B15     | 0,50473 | 0       |
| ALDH3A1     | 0,50099 | 0,00027 |
| INMT-MINDY4 | 0,49774 | 0       |
| MIR622      | 0,49356 | 0       |
| EEF1A2      | 0,48771 | 0,00021 |
| KRT75       | 0,48638 | 0,00039 |
| KRT6C       | 0,48638 | 0,00039 |
| KRT6A       | 0,48638 | 0,00039 |
| GAS6        | 0,47767 | 0,00072 |
| ODC1        | 0,47365 | 0,00006 |
| ABCC4       | 0,46942 | 0,00012 |
| PHPT1       | 0,46683 | 0,00139 |
| TNFAIP3     | 0,46502 | 0,00393 |
| ACSS3       | 0,46478 | 0,00352 |
| SREBF2      | 0,46243 | 0,00079 |
| FASN        | 0,45841 | 0,00217 |
| TP53I3      | 0,45801 | 0,00281 |
| CDKN1A      | 0,45664 | 0,00746 |
| SULT1C2     | 0,4531  | 0,0026  |
| EBP         | 0,45234 | 0,00103 |
| RPS4Y1      | 0,44788 | 0,00102 |
| CES1        | 0,44352 | 0,00211 |
| PCCB        | 0,4424  | 0,00183 |
| LAPTM4B     | 0,44206 | 0,03977 |
| NPM2        | 0,44115 | 0,0003  |
| TTY14       | 0,42928 | 0,00939 |
| CKS2        | 0,428   | 0,00075 |
| IDO2        | 0,4181  | 0,03844 |
| VTRNA1-1    | 0,41572 | 0,00104 |
| KRT79       | 0,41527 | 0,02188 |
| RGCC        | 0,41011 | 0,01308 |
| RRM2B       | 0,39767 | 0       |
| USP22       | 0,39765 | 0,00248 |
| SPATA18     | 0,39709 | 0,01552 |
| IDH2        | 0,39659 | 0,00011 |
| PEPD        | 0,39659 | 0,00251 |
| PINK1       | 0,39367 | 0,00183 |
| PRDX5       | 0,39256 | 0,00003 |
| EXT1        | 0,38911 | 0,00004 |
| MAP4        | 0,38689 | 0,00322 |
| VAMP5       | 0,38498 | 0,00251 |

|              |         |         |
|--------------|---------|---------|
| PDP2         | 0,3842  | 0,01306 |
| ANTXR1       | 0,38312 | 0,02316 |
| AKR1C3       | 0,38221 | 0,00031 |
| STOM         | 0,38202 | 0,00605 |
| NPC1L1       | 0,37824 | 0,00608 |
| CSTB         | 0,37636 | 0,00139 |
| CAPN2        | 0,37079 | 0,01381 |
| GUCA2B       | 0,37073 | 0,02007 |
| ATP9A        | 0,36919 | 0,00012 |
| GAS6-AS1     | 0,36786 | 0       |
| ACP5         | 0,36726 | 0,01695 |
| CAP2         | 0,36689 | 0,00704 |
| ALPL         | 0,3662  | 0,00591 |
| PCOLCE       | 0,36594 | 0,00288 |
| PIEZO1       | 0,36396 | 0,00082 |
| NEK8         | 0,36237 | 0,00329 |
| TRIM35       | 0,35877 | 0,01566 |
| NOS2         | 0,35857 | 0,00102 |
| TMEM92       | 0,3571  | 0,03003 |
| ANKRD29      | 0,35709 | 0,038   |
| CPT1B        | 0,35096 | 0,00352 |
| TNFRSF10A    | 0,35049 | 0,00014 |
| NAP1L1       | 0,34358 | 0,01793 |
| SHISA4       | 0,34021 | 0,0012  |
| DLGAP1-AS3   | 0,3394  | 0,01151 |
| PLXNA4       | 0,33866 | 0,0042  |
| MMP14        | 0,33767 | 0,03423 |
| ARPC5L       | 0,33727 | 0,02106 |
| ANXA2P1      | 0,3358  | 0       |
| DCBLD2       | 0,33571 | 0,04851 |
| CPEB4        | 0,33434 | 0,04317 |
| ZNF329       | 0,33252 | 0,00925 |
| DPYSL2       | 0,33225 | 0,02726 |
| PADI1        | 0,3314  | 0,02076 |
| LOC100422781 | 0,32468 | 0,00101 |
| SRPX2        | 0,32414 | 0,02308 |
| TXNRD1       | 0,32028 | 0,01216 |
| MYL12B       | 0,31964 | 0,00036 |
| FDXR         | 0,31846 | 0,00419 |
| P2RX5        | 0,31641 | 0,01481 |
| HNRNPA1      | 0,31585 | 0,00191 |

|            |         |         |
|------------|---------|---------|
| MSN        | 0,3135  | 0,04095 |
| C1orf198   | 0,31292 | 0,02823 |
| ETFA       | 0,31268 | 0,00224 |
| PLK2       | 0,31244 | 0,00925 |
| SKAP2      | 0,31156 | 0,04783 |
| ASPN       | 0,31041 | 0,04162 |
| CNPPD1     | 0,31014 | 0,0354  |
| GNL2       | 0,31006 | 0,0341  |
| TNIP1      | 0,30767 | 0,00255 |
| RGMA       | 0,30552 | 0,04655 |
| PRXL2A     | 0,30499 | 0,002   |
| CASTOR2    | 0,29919 | 0,03858 |
| SKP2       | 0,29875 | 0,00569 |
| HSD11B1    | 0,29603 | 0,01763 |
| ALDH1L1    | 0,29497 | 0,03315 |
| PTPN11     | 0,29468 | 0,00088 |
| EHD4       | 0,29376 | 0,00393 |
| RBM24      | 0,29322 | 0,04213 |
| CEP89      | 0,29259 | 0,01791 |
| WDPCP      | 0,28705 | 0,0102  |
| EPHA3      | 0,2867  | 0,02811 |
| TNFRSF10D  | 0,28657 | 0,00281 |
| FABP4      | 0,28543 | 0,01695 |
| TWSG1      | 0,28222 | 0,03749 |
| CETN2      | 0,28094 | 0,00065 |
| IKBKE      | 0,27794 | 0,0138  |
| SUSD2      | 0,27694 | 0,00195 |
| PRKAG1     | 0,27664 | 0,00056 |
| PPA1       | 0,27629 | 0,001   |
| DLAT       | 0,27626 | 0,025   |
| RSU1       | 0,27169 | 0,02154 |
| NLRP9      | 0,26809 | 0,00096 |
| ABLIM1     | 0,26541 | 0,00608 |
| JUND       | 0,26089 | 0,00297 |
| KLF3       | -0,2605 | 0,02711 |
| CACTIN-AS1 | -0,2622 | 0,02984 |
| HNRNPH3    | -0,2662 | 0,00037 |
| CCR1       | -0,2672 | 0,01476 |
| TANGO6     | -0,2684 | 0,0224  |
| HOMER2     | -0,2701 | 0,00084 |
| MET        | -0,2717 | 0,0085  |



|          |         |         |
|----------|---------|---------|
| FNDC3A   | -0,2717 | 0,00024 |
| HLA-E    | -0,2731 | 0,04053 |
| SCCPDH   | -0,2732 | 0,00072 |
| APOM     | -0,2735 | 0,01519 |
| TESK2    | -0,2738 | 0,01163 |
| ZKSCAN1  | -0,2771 | 0,00176 |
| SLC27A2  | -0,2775 | 0,04818 |
| SNTB1    | -0,2779 | 0,0313  |
| FBXW11   | -0,2794 | 0,04004 |
| GSTA7P   | -0,2798 | 0,00111 |
| MIR644A  | -0,28   | 0,00125 |
| PCDH12   | -0,2822 | 0,02233 |
| LRP6     | -0,2825 | 0,00479 |
| RXYLT1   | -0,285  | 0,04523 |
| PER2     | -0,2865 | 0,01155 |
| GALK1    | -0,2872 | 0,00637 |
| SARDH    | -0,2906 | 0,01989 |
| ESPN     | -0,2918 | 0,00267 |
| SPINK4   | -0,2925 | 0,01574 |
| C4B      | -0,2958 | 0,03856 |
| MPC2     | -0,3006 | 0,00331 |
| SCARNA17 | -0,3007 | 0       |
| NHSL1    | -0,3019 | 0,00045 |
| NR1I3    | -0,3034 | 0,01571 |
| NCAM2    | -0,3041 | 0,03243 |
| HAAO     | -0,3044 | 0,00562 |
| C8B      | -0,3049 | 0,008   |
| MTFP1    | -0,3061 | 0,00017 |
| ERVK-7   | -0,3082 | 0,01111 |
| CPVL     | -0,3084 | 0,0285  |
| XRCC5    | -0,3106 | 0,00345 |
| GPBP1L1  | -0,3121 | 0,01112 |
| RSBN1L   | -0,3137 | 0,02585 |
| KDM6A    | -0,314  | 0,0379  |
| SPICE1   | -0,315  | 0,00078 |
| SCARNA9L | -0,3153 | 0,02719 |
| MT3      | -0,3169 | 0,00001 |
| MARCH1   | -0,318  | 0,03763 |
| SORD     | -0,3186 | 0,02274 |
| PAFAH2   | -0,3196 | 0,00349 |
| SIPA1L2  | -0,3208 | 0,01469 |

|          |         |         |
|----------|---------|---------|
| ARRDC3   | -0,3218 | 0,01053 |
| IDNK     | -0,3229 | 0,00013 |
| SLC22A3  | -0,3236 | 0,01746 |
| GRTP1    | -0,3248 | 0,00285 |
| SDC2     | -0,3252 | 0,00195 |
| AGMO     | -0,3253 | 0,00072 |
| PGLYRP2  | -0,3283 | 0,00635 |
| RELN     | -0,3328 | 0,00251 |
| NAAA     | -0,3422 | 0,00164 |
| AZGP1    | -0,3428 | 0,01204 |
| FGB      | -0,3458 | 0,04746 |
| SLC9A9   | -0,3473 | 0,00324 |
| DBX1     | -0,3486 | 0,00033 |
| HAO2     | -0,3521 | 0,00038 |
| TUBE1    | -0,3531 | 0,01978 |
| C8A      | -0,3557 | 0,00047 |
| ZNF16    | -0,356  | 0,00204 |
| MT1E     | -0,3565 | 0       |
| ANG      | -0,3572 | 0,01894 |
| SPP2     | -0,3573 | 0,00175 |
| C6       | -0,3591 | 0,00704 |
| PNPLA4   | -0,361  | 0,00479 |
| PAIP2B   | -0,3622 | 0,00111 |
| FBXO32   | -0,3634 | 0,00098 |
| SNORD70  | -0,3647 | 0,00789 |
| RBP5     | -0,3665 | 0,0005  |
| FCN2     | -0,3687 | 0,01439 |
| TMEM132C | -0,3691 | 0,00103 |
| STX3     | -0,3695 | 0,0298  |
| EFNA1    | -0,3704 | 0,00017 |
| ACADSB   | -0,3712 | 0,04218 |
| AGXT2    | -0,3715 | 0,038   |
| ESR1     | -0,3719 | 0,00045 |
| MACO1    | -0,3754 | 0,00171 |
| GDF5     | -0,3763 | 0,00005 |
| AGXT     | -0,3765 | 0,00117 |
| NAT8L    | -0,377  | 0,01117 |
| CPN1     | -0,3771 | 0,00415 |
| ZBTB32   | -0,3776 | 0,00745 |
| MPV17L   | -0,3783 | 0,03899 |
| ADAMTSL3 | -0,3796 | 0,00002 |

|             |         |         |
|-------------|---------|---------|
| ABCG5       | -0,3813 | 0,0003  |
| CD163L1     | -0,3823 | 0,00161 |
| BPIFB1      | -0,3824 | 0,00867 |
| LINC02396   | -0,3831 | 0,00052 |
| ACOX2       | -0,3864 | 0,00033 |
| MT1JP       | -0,3866 | 0,0001  |
| NID2        | -0,394  | 0,01285 |
| TEF         | -0,3943 | 0,04091 |
| MAP2K1      | -0,3966 | 0,0066  |
| MIR505      | -0,3967 | 0,00014 |
| SIRT5       | -0,3973 | 0,03113 |
| PCNT        | -0,398  | 0,00082 |
| ALAS1       | -0,398  | 0,00511 |
| KCNE3       | -0,3985 | 0,01376 |
| CFAP298     | -0,3992 | 0       |
| LIN28B      | -0,3994 | 0,02984 |
| CCL15-CCL14 | -0,4017 | 0,00005 |
| CD82        | -0,4028 | 0,00003 |
| NTN4        | -0,4034 | 0,00013 |
| MARC2       | -0,4041 | 0,00017 |
| DPYD        | -0,4053 | 0,00029 |
| GCH1        | -0,4055 | 0,00637 |
| FRMD4B      | -0,406  | 0,00119 |
| SGO2        | -0,4063 | 0,0179  |
| SLC6A13     | -0,4125 | 0,00161 |
| MAPKAPK3    | -0,4128 | 0,00128 |
| MS4A14      | -0,4134 | 0,01287 |
| PON1        | -0,4176 | 0,0138  |
| CD4         | -0,4216 | 0,00255 |
| C3orf85     | -0,4219 | 0,01188 |
| AOC4P       | -0,4258 | 0,00698 |
| MT1IP       | -0,427  | 0,00107 |
| MYO9A       | -0,43   | 0,04002 |
| PLCB1       | -0,4318 | 0,00314 |
| MT1DP       | -0,4331 | 0,00007 |
| AADAT       | -0,4391 | 0       |
| PRRG4       | -0,4398 | 0,00005 |
| FGF2        | -0,4409 | 0,01162 |
| PTPRD       | -0,4432 | 0,00049 |
| MBNL3       | -0,449  | 0,00021 |
| WNK3        | -0,4498 | 0,00813 |

|           |         |         |
|-----------|---------|---------|
| ENPEP     | -0,4528 | 0,00002 |
| ZFP1      | -0,4546 | 0,00084 |
| CPA3      | -0,4554 | 0,01578 |
| COLEC10   | -0,4578 | 0,00008 |
| GPR82     | -0,4597 | 0,01124 |
| GGH       | -0,4611 | 0       |
| ARSD      | -0,4643 | 0,00024 |
| LINC02291 | -0,4693 | 0,01153 |
| RAI14     | -0,4698 | 0       |
| PPP1R1A   | -0,47   | 0,00172 |
| CLPTM1L   | -0,4784 | 0,00262 |
| C3P1      | -0,4784 | 0,00072 |
| DNAJC12   | -0,4821 | 0,00042 |
| CXCR2P1   | -0,4894 | 0,00265 |
| NRN1      | -0,4917 | 0,00055 |
| NT5E      | -0,5015 | 0,00029 |
| VIL1      | -0,5101 | 0,00251 |
| TMED6     | -0,5159 | 0,01763 |
| SGCE      | -0,5178 | 0,00449 |
| GNMT      | -0,5241 | 0,0156  |
| CETP      | -0,5247 | 0       |
| MAP4K4    | -0,5275 | 0,00139 |
| TMTC1     | -0,5379 | 0,00274 |
| ZG16      | -0,5517 | 0       |
| TFPI2     | -0,5526 | 0,04927 |
| CXADR     | -0,5546 | 0,00009 |
| MT1A      | -0,5576 | 0,01308 |
| PLN       | -0,5699 | 0,04851 |
| UGT2A2    | -0,5831 | 0,03833 |
| APOF      | -0,5925 | 0       |
| MT1F      | -0,6034 | 0,00081 |
| A1CF      | -0,6069 | 0       |
| MT1H      | -0,6291 | 0,00029 |
| CYP2C8    | -0,6333 | 0,00745 |
| CPS1-IT1  | -0,6356 | 0,0037  |
| SLCO4C1   | -0,6366 | 0,00082 |
| OAT       | -0,6423 | 0,00143 |
| DOK6      | -0,6534 | 0       |
| CLEC4M    | -0,6642 | 0       |
| CFHR5     | -0,6724 | 0       |
| SH3BP5L   | -0,6764 | 0,00001 |

|          |         |         |
|----------|---------|---------|
| MT1B     | -0,6956 | 0,0005  |
| MT1G     | -0,7132 | 0,00005 |
| HYDIN    | -0,7268 | 0,0066  |
| RALGDS   | -0,7319 | 0,00001 |
| SERPINA1 | -0,7492 | 0       |
| SLCO1B7  | -0,7528 | 0,00142 |
| SLC22A10 | -0,7554 | 0,00082 |
| VCAM1    | -0,762  | 0       |
| CYP2C19  | -0,7788 | 0       |
| MT1M     | -0,797  | 0,00001 |
| FAM151A  | -0,9087 | 0,00011 |
| RGS5     | -1,0094 | 0       |
| POSTN    | -1,02   | 0       |
| TIMD4    | -1,0458 | 0       |
| TCP10L2  | -1,0977 | 0       |
| SPINK1   | -1,3058 | 0,03186 |
| PZP      | -2,1803 | 0       |
| XIST     | -2,4226 | 0,0005  |

**Clusters liver specific vs Cluster control (C)**

| <b>Liver gene</b> | <b>logFC</b> | <b>adj.P.Val</b> |
|-------------------|--------------|------------------|
| EIF1AY            | 1,86898      | 0,00301          |
| SPP1              | 1,41634      | 0                |
| HULC              | 1,1743       | 0,00301          |
| CXCL9             | 1,16509      | 0,00478          |
| LPL               | 1,1208       | 0                |
| FABP5             | 1,02792      | 0                |
| CCL20             | 0,98958      | 0,0033           |
| UTY               | 0,9538       | 0,03157          |
| USP9Y             | 0,94953      | 0,00486          |
| CYP7A1            | 0,88766      | 0,04621          |
| ENO3              | 0,8743       | 0,0024           |
| PLA2G7            | 0,84478      | 0,00003          |
| DTNA              | 0,84369      | 0,0024           |
| CXCL10            | 0,80077      | 0,01993          |
| DDX3Y             | 0,74976      | 0,00289          |
| CD83              | 0,71029      | 0,02172          |
| TPX2              | 0,68238      | 0,00335          |
| TTY14             | 0,64671      | 0,00269          |
| RRM2              | 0,59777      | 0,01158          |

|            |         |         |
|------------|---------|---------|
| ACPS       | 0,56035 | 0,00418 |
| RPS4Y1     | 0,54993 | 0,0047  |
| CCNB1      | 0,54813 | 0,00418 |
| ANXA2P2    | 0,54382 | 0,0024  |
| ZWINT      | 0,52704 | 0,0024  |
| MKI67      | 0,51645 | 0,0033  |
| TP53I3     | 0,51498 | 0,04246 |
| FABP4      | 0,50935 | 0,00039 |
| AURKB      | 0,49873 | 0,00464 |
| PRKG1-AS1  | 0,48434 | 0,01333 |
| FBXO27     | 0,48008 | 0,00838 |
| TMEM169    | 0,4662  | 0,01806 |
| HIST1H3C   | 0,46374 | 0,0024  |
| TXLNGY     | 0,45784 | 0,04754 |
| TGFBI      | 0,44675 | 0,00171 |
| ADAM2      | 0,41532 | 0,02628 |
| HMGB3      | 0,37122 | 0,02172 |
| MIR622     | 0,35915 | 0,03826 |
| PCNA       | 0,35549 | 0,01641 |
| ABCB1      | 0,33065 | 0,0024  |
| PTPN11     | 0,31971 | 0,02557 |
| ANXA2P1    | 0,29357 | 0,00154 |
| LCE6A      | 0,28604 | 0,01517 |
| AOX1       | -0,3812 | 0,04528 |
| CD82       | -0,3957 | 0,01067 |
| PNPLA4     | -0,4248 | 0,03863 |
| SCARNA9L   | -0,4657 | 0,01317 |
| FAM111A-DT | -0,5336 | 0,01975 |
| APOF       | -0,549  | 0,00433 |
| FGB        | -0,623  | 0,0024  |
| VIL1       | -0,663  | 0,0047  |
| LPA        | -0,7112 | 0,02908 |
| CYP2C8     | -0,7799 | 0,03173 |
| TIMD4      | -0,8142 | 0,00301 |
| AVPR1A     | -0,9464 | 0,01158 |
| IGFBP2     | -1,3116 | 0,01397 |
| PZP        | -2,0525 | 0,00091 |
| XIST       | -2,8372 | 0,0047  |

**Cluster cardiometabolic vs Cluster Liver specific (D)**

| METABOLITE_NAME                                  | logFC   | adj.P.Val |
|--------------------------------------------------|---------|-----------|
| tyramine O-sulfate                               | 4,33663 | 0,0479    |
| 4-hydroxyphenylacetylglutamine                   | 3,39016 | 0,00001   |
| sucrose                                          | 2,3153  | 0,01285   |
| orotidine                                        | 1,83506 | 0,01554   |
| p-cresol glucuronide*                            | 1,62583 | 0         |
| homocitrulline                                   | 1,23214 | 0         |
| pentose acid*                                    | 1,22366 | 0,00035   |
| 3-methylglutaryl carnitine (2)                   | 1,19879 | 0         |
| indoleacetylglutamine                            | 1,18013 | 0,00241   |
| 4-hydroxyphenylacetate                           | 1,16791 | 0,00171   |
| 4-hydroxyphenylacetyl carnitine                  | 1,13727 | 0,01075   |
| imidazole propionate                             | 1,0499  | 0,00106   |
| phenylacetylglutamate                            | 1,04822 | 0         |
| deoxycholate                                     | 1,04822 | 0,00085   |
| guanidinosuccinate                               | 1,01478 | 0,00011   |
| lactose                                          | 1,00781 | 0,02752   |
| trigonelline (N'-methylnicotinate)               | 0,98041 | 0,00089   |
| lyxonate                                         | 0,92866 | 0,00062   |
| 1-methyl-5-imidazoleacetate                      | 0,91271 | 0,04254   |
| arabonate/xylonate                               | 0,89813 | 0         |
| 11beta-hydroxyetiocholanolone glucuronide*       | 0,87723 | 0,00036   |
| 1-carboxyethylvaline                             | 0,86528 | 0         |
| N2,N5-diacetylornithine                          | 0,86501 | 0         |
| 1-carboxyethylisoleucine                         | 0,82315 | 0         |
| 3-methylglutaconate                              | 0,79542 | 0         |
| glutamine conjugate of C6H10O2 (2)*              | 0,777   | 0,00191   |
| palmitoyl-oleoyl-glycerol (16:0/18:1) [1]*       | 0,75123 | 0         |
| palmitoyl-arachidonoyl-glycerol (16:0/20:4) [1]* | 0,74772 | 0         |
| deoxycholic acid 12-sulfate*                     | 0,74543 | 0,00473   |
| palmitoyl-oleoyl-glycerol (16:0/18:1) [2]*       | 0,73008 | 0         |
| palmitoyl-arachidonoyl-glycerol (16:0/20:4) [2]* | 0,72246 | 0         |
| lithocholate sulfate (1)                         | 0,69189 | 0,00114   |
| oleoyl-arachidonoyl-glycerol (18:1/20:4) [2]*    | 0,68857 | 0         |
| 11beta-hydroxyandrosterone glucuronide           | 0,68719 | 0,00178   |
| 1-carboxyethylleucine                            | 0,68583 | 0         |
| glutamine conjugate of C7H12O2*                  | 0,66986 | 0,00092   |
| diacylglycerol (14:0/18:1, 16:0/16:1) [2]*       | 0,66894 | 0,00015   |
| 1-ribosyl-imidazoleacetate*                      | 0,6629  | 0,00005   |
| 1-palmitoyl-2-oleoyl-GPE (16:0/18:1)             | 0,66264 | 0         |

|                                                     |         |         |
|-----------------------------------------------------|---------|---------|
| 1-palmitoyl-2-docosahexaenoyl-GPE (16:0/22:6)*      | 0,66195 | 0       |
| 1-stearoyl-2-docosahexaenoyl-GPE (18:0/22:6)*       | 0,65135 | 0       |
| phenylacetylglutamine                               | 0,64766 | 0       |
| cholic acid glucuronide                             | 0,64373 | 0,02929 |
| oleoyl-arachidonoyl-glycerol (18:1/20:4) [1]*       | 0,64069 | 0       |
| phenol sulfate                                      | 0,635   | 0,00029 |
| 1-oleoyl-2-linoleoyl-GPE (18:1/18:2)*               | 0,62497 | 0       |
| N-acetylhomocitrulline                              | 0,62072 | 0,00124 |
| myristoyl-linoleoyl-glycerol (14:0/18:2) [2]*       | 0,61525 | 0,00051 |
| linoleoyl-linoleoyl-glycerol (18:2/18:2) [2]*       | 0,61487 | 0,00062 |
| 1-stearoyl-2-oleoyl-GPE (18:0/18:1)                 | 0,61117 | 0       |
| glucuronide of C14H22O4 (2)*                        | 0,604   | 0,00602 |
| gulonate*                                           | 0,59901 | 0,00005 |
| linoleoyl-arachidonoyl-glycerol (18:2/20:4) [1]*    | 0,59002 | 0       |
| linoleoyl-linoleoyl-glycerol (18:2/18:2) [1]*       | 0,58314 | 0,00006 |
| linoleoyl-arachidonoyl-glycerol (18:2/20:4) [2]*    | 0,58142 | 0       |
| 1-carboxyethylphenylalanine                         | 0,57911 | 0       |
| 2,3-dihydroxy-2-methylbutyrate                      | 0,57884 | 0       |
| trimethylamine N-oxide                              | 0,57837 | 0,00078 |
| 1-carboxyethyltyrosine                              | 0,57749 | 0       |
| fructosylllysine                                    | 0,57677 | 0       |
| chenodeoxycholic acid sulfate (1)                   | 0,57356 | 0,00176 |
| palmitoleoyl-arachidonoyl-glycerol (16:1/20:4) [2]* | 0,57338 | 0,00014 |
| 1-palmitoyl-2-arachidonoyl-GPE (16:0/20:4)*         | 0,57241 | 0       |
| linoleoyl-linolenoyl-glycerol (18:2/18:3) [1]*      | 0,5666  | 0,01644 |
| lanthionine                                         | 0,56379 | 0,00003 |
| myristoyl-linoleoyl-glycerol (14:0/18:2) [1]*       | 0,56265 | 0,00023 |
| phenol glucuronide                                  | 0,56128 | 0,01798 |
| dopamine 4-sulfate                                  | 0,5608  | 0,00002 |
| oleoyl-oleoyl-glycerol (18:1/18:1) [1]*             | 0,56012 | 0       |
| N-carbamoylalanine                                  | 0,55787 | 0,00003 |
| diacylglycerol (14:0/18:1, 16:0/16:1) [1]*          | 0,5546  | 0,00024 |
| 1-stearoyl-2-linoleoyl-GPE (18:0/18:2)*             | 0,54942 | 0       |
| 1-palmitoyl-2-linoleoyl-GPE (16:0/18:2)             | 0,54699 | 0       |
| glutamine conjugate of C6H10O2 (1)*                 | 0,54524 | 0,00058 |
| oleoyl-oleoyl-glycerol (18:1/18:1) [2]*             | 0,52413 | 0       |
| methylsuccinoylcarnitine                            | 0,52017 | 0,01467 |
| L-urobilin                                          | 0,51759 | 0,01253 |
| tetrahydrocortisol glucuronide                      | 0,51481 | 0,00014 |
| xylose                                              | 0,51344 | 0,02348 |
| ascorbic acid 3-sulfate*                            | 0,50631 | 0       |



|                                                       |         |         |
|-------------------------------------------------------|---------|---------|
| 1-stearoyl-2-arachidonoyl-GPE (18:0/20:4)             | 0,49959 | 0       |
| diacylglycerol (16:1/18:2 [2], 16:0/18:3 [1])*        | 0,49137 | 0,00023 |
| linoleoyl-linolenoyl-glycerol (18:2/18:3) [2]*        | 0,48441 | 0,00609 |
| docosatrienoate (22:3n6)*                             | 0,48354 | 0       |
| trans-2-hexenoylglycine                               | 0,47959 | 0,00003 |
| linoleoyl-docosahexaenoyl-glycerol (18:2/22:6) [1]*   | 0,47571 | 0,00839 |
| N-acetyltaurine                                       | 0,47537 | 0       |
| 8-methoxykynurenate                                   | 0,4647  | 0,00516 |
| glucose                                               | 0,46415 | 0       |
| diacylglycerol (12:0/18:1, 14:0/16:1, 16:0/14:1) [2]* | 0,46168 | 0,0101  |
| 11-ketoetiocholanolone glucuronide                    | 0,45807 | 0,00026 |
| methionine sulfone                                    | 0,45421 | 0       |
| cystathionine                                         | 0,45343 | 0,00586 |
| chenodeoxycholic acid 24-glucuronide                  | 0,4529  | 0,03301 |
| maltose                                               | 0,44647 | 0,00016 |
| dopamine 3-O-sulfate                                  | 0,44545 | 0,00011 |
| (S)-3-hydroxybutyrylcarnitine                         | 0,44429 | 0,00044 |
| palmitoyl-linoleoyl-glycerol (16:0/18:2) [2]*         | 0,44397 | 0,00057 |
| stearoyl-arachidonoyl-glycerol (18:0/20:4) [1]*       | 0,43853 | 0       |
| oleoyl-linoleoyl-glycerol (18:1/18:2) [2]             | 0,43731 | 0       |
| prolylglycine                                         | 0,43098 | 0,00057 |
| oleoyl-linoleoyl-glycerol (18:1/18:2) [1]             | 0,4236  | 0       |
| N,N,N-trimethyl-5-aminovalerate                       | 0,41748 | 0       |
| ribonate                                              | 0,40856 | 0       |
| palmitoyl-docosahexaenoyl-glycerol (16:0/22:6) [1]*   | 0,40426 | 0,01463 |
| vanillactate                                          | 0,40125 | 0,00088 |
| 4-acetamidobutanoate                                  | 0,39846 | 0,00767 |
| pyridoxate                                            | 0,39352 | 0,01516 |
| cytosine                                              | 0,39015 | 0,00214 |
| cis-3,4-methyleneheptanoylglycine                     | 0,38555 | 0,00105 |
| galactonate                                           | 0,38554 | 0,02824 |
| N-acetyl-1-methylhistidine*                           | 0,38512 | 0,02595 |
| glucuronate                                           | 0,37981 | 0,00002 |
| 3-methyladipate                                       | 0,37968 | 0,02357 |
| N-carbamoylvaline                                     | 0,37842 | 0,00043 |
| fructose                                              | 0,37725 | 0       |
| hydroxy-N6,N6,N6-trimethyllysine*                     | 0,37616 | 0,00003 |
| 2-stearoyl-GPE (18:0)*                                | 0,3751  | 0       |
| 1-methyl-4-imidazoleacetate                           | 0,37395 | 0,00206 |

|                                                  |         |         |
|--------------------------------------------------|---------|---------|
| adrenate (22:4n6)                                | 0,37185 | 0       |
| 4-imidazoleacetate                               | 0,36853 | 0,00884 |
| palmitoleoyl-linoleoyl-glycerol (16:1/18:2) [1]* | 0,36733 | 0,00391 |
| picolinoylglycine                                | 0,3648  | 0,00027 |
| hydantoin-5-propionate                           | 0,36029 | 0,01364 |
| alpha-hydroxycaproate                            | 0,35707 | 0,00767 |
| hexanoylglutamine                                | 0,3502  | 0,02528 |
| mannose                                          | 0,34869 | 0       |
| N-delta-acetylornithine                          | 0,34667 | 0,00328 |
| ceramide (d18:1/17:0, d17:1/18:0)*               | 0,34411 | 0,00001 |
| gamma-CEHC glucuronide*                          | 0,34291 | 0,00062 |
| 3-indoxyl sulfate                                | 0,34253 | 0,00052 |
| N6-succinyladenosine                             | 0,33757 | 0,00006 |
| palmitoleoyl-oleoyl-glycerol (16:1/18:1) [2]*    | 0,32951 | 0,02835 |
| heptenedioate (C7:1-DC)*                         | 0,32414 | 0,00054 |
| pipecolate                                       | 0,32402 | 0,0408  |
| N-acetylneuraminate                              | 0,32022 | 0       |
| arabitol/xylitol                                 | 0,31735 | 0       |
| carnitine of C10H14O2 (5)*                       | 0,31473 | 0,00604 |
| margarate (17:0)                                 | 0,31359 | 0       |
| acisoga                                          | 0,31347 | 0,00002 |
| palmitoleoyl-oleoyl-glycerol (16:1/18:1) [1]*    | 0,30997 | 0,03895 |
| erythronate*                                     | 0,2972  | 0       |
| ascorbic acid 2-sulfate                          | 0,28778 | 0       |
| 3-hydroxymyristate                               | 0,28551 | 0,00115 |
| N1-methylinosine                                 | 0,27674 | 0,00087 |
| arabinose                                        | 0,27307 | 0,00063 |
| docosatrienoate (22:3n3)                         | 0,27042 | 0,00511 |
| N-stearoyl-sphingosine (d18:1/18:0)*             | 0,26489 | 0       |
| 2-O-methylascorbic acid                          | 0,26169 | 0,00006 |
| ceramide (d16:1/24:1, d18:1/22:1)*               | 0,26113 | 0,00043 |
| pantoate                                         | 0,26076 | 0,02545 |
| pregnenediol disulfate (C21H34O8S2)*             | -0,2702 | 0,02837 |
| stearoylcholine*                                 | -0,2703 | 0,00086 |
| 3beta,7alpha-dihydroxy-5-cholestenoate           | -0,2723 | 0,00025 |
| octadecenedioylcarnitine (C18:1-DC)*             | -0,2822 | 0,00694 |
| dehydroepiandrosterone sulfate (DHEA-S)          | -0,2901 | 0,0074  |
| linoleoylcholine*                                | -0,2912 | 0,00012 |
| behenoyl dihydrosphingomyelin (d18:0/22:0)*      | -0,2932 | 0,00005 |
| eicosapentaenoylcholine                          | -0,2959 | 0,03141 |
| sphingomyelin (d18:0/18:0, d19:0/17:0)*          | -0,3008 | 0,00231 |

|                                                  |         |         |
|--------------------------------------------------|---------|---------|
| glycosyl ceramide (d18:2/24:1, d18:1/24:2)*      | -0,3028 | 0       |
| glycosyl ceramide (d18:1/23:1, d17:1/24:1)*      | -0,3118 | 0,00005 |
| androstenediol (3alpha, 17alpha) monosulfate (2) | -0,3126 | 0,0143  |
| dihomo-linolenoyl-choline                        | -0,3223 | 0,0022  |
| phenylalanylhydroxyproline*                      | -0,3226 | 0,04873 |
| glutamine_degradant*                             | -0,3245 | 0,01312 |
| pregnenetriol sulfate*                           | -0,3285 | 0,00123 |
| docosahexaenoylcarnitine (C22:6)*                | -0,3405 | 0,00158 |
| octadecadienedioate (C18:2-DC)*                  | -0,341  | 0,00145 |
| pregnenediol sulfate (C21H34O5S)*                | -0,3422 | 0,00396 |
| androsterone glucuronide                         | -0,3449 | 0,0358  |
| eicosanedioate (C20-DC)                          | -0,345  | 0,00051 |
| N-stearoylserine*                                | -0,3582 | 0       |
| 1-stearoyl-2-oleoyl-GPI (18:0/18:1)*             | -0,3713 | 0,00007 |
| spermidine                                       | -0,3716 | 0,00142 |
| 17alpha-hydroxypregnenolone 3-sulfate            | -0,3742 | 0,01111 |
| glycocholenate sulfate*                          | -0,3867 | 0       |
| glycohyocholate                                  | -0,4028 | 0,01672 |
| N,N-dimethylalanine                              | -0,4255 | 0,0124  |
| pregnenolone sulfate                             | -0,4276 | 0,00175 |
| hydroxy-CMPF*                                    | -0,4441 | 0,04481 |
| andro steroid monosulfate C19H28O6S (1)*         | -0,448  | 0,00698 |
| GlcNAc sulfate conjugate of C21H34O2 steroid**   | -0,4744 | 0,00297 |
| 16a-hydroxy DHEA 3-sulfate                       | -0,5671 | 0,00116 |
| 1,5-anhydroglucitol (1,5-AG)                     | -0,6057 | 0       |
| N-methylproline                                  | -0,7204 | 0,03895 |
| taurocholenate sulfate*                          | -0,78   | 0       |
| taurochenodeoxycholic acid 3-sulfate             | -0,9593 | 0,00152 |

**Cluster cardiometabolic vs Cluster control (E)**

| <b>METABOLITE_NAME</b>           | <b>logFC</b> | <b>adj.P.Val</b> |
|----------------------------------|--------------|------------------|
| tyramine O-sulfate               | 5,52269      | 0,00003          |
| 4-hydroxyphenylacetylglutamine   | 3,36526      | 0                |
| sucrose                          | 1,86875      | 0,00109          |
| orotidine                        | 1,67048      | 0,00033          |
| cholate                          | 1,51295      | 0,0082           |
| 4-hydroxyphenylacetate           | 1,38339      | 0                |
| 4-hydroxyphenylacetoylecarnitine | 1,32253      | 0                |
| p-cresol glucuronide*            | 1,23014      | 0                |
| deoxycholate                     | 1,22076      | 0                |

|                                                       |         |         |
|-------------------------------------------------------|---------|---------|
| 1-carboxyethylisoleucine                              | 1,21874 | 0       |
| 1-carboxyethylvaline                                  | 1,18947 | 0       |
| imidazole propionate                                  | 1,16969 | 0       |
| 5alpha-androstan-3alpha,17beta-diol monosulfate (2)   | 1,16808 | 0,00219 |
| palmitoyl-oleoyl-glycerol (16:0/18:1) [1]*            | 1,13997 | 0       |
| lactose                                               | 1,12153 | 0,00005 |
| palmitoyl-oleoyl-glycerol (16:0/18:1) [2]*            | 1,08933 | 0       |
| pentose acid*                                         | 1,07619 | 0       |
| 1-carboxyethylleucine                                 | 1,06568 | 0       |
| homocitrulline                                        | 1,06417 | 0       |
| diacylglycerol (14:0/18:1, 16:0/16:1) [2]*            | 1,02945 | 0       |
| deoxycholic acid glucuronide                          | 0,99346 | 0       |
| palmitoyl-arachidonoyl-glycerol (16:0/20:4) [1]*      | 0,93825 | 0       |
| diacylglycerol (12:0/18:1, 14:0/16:1, 16:0/14:1) [2]* | 0,92719 | 0       |
| 1-carboxyethylphenylalanine                           | 0,92133 | 0       |
| phenol glucuronide                                    | 0,92056 | 0       |
| myristoyl-linoleoyl-glycerol (14:0/18:2) [2]*         | 0,91343 | 0       |
| lyxonate                                              | 0,91088 | 0       |
| palmitoyl-arachidonoyl-glycerol (16:0/20:4) [2]*      | 0,90537 | 0       |
| indoleacetylglutamine                                 | 0,89499 | 0,00023 |
| 1-methyl-5-imidazoleacetate                           | 0,88722 | 0,00117 |
| guanidinosuccinate                                    | 0,88669 | 0       |
| diacylglycerol (14:0/18:1, 16:0/16:1) [1]*            | 0,8792  | 0       |
| 1-stearoyl-2-oleoyl-GPE (18:0/18:1)                   | 0,87768 | 0       |
| chenodeoxycholic acid sulfate (1)                     | 0,87373 | 0       |
| arabonate/xylonate                                    | 0,87231 | 0       |
| myristoyl-linoleoyl-glycerol (14:0/18:2) [1]*         | 0,86887 | 0       |
| 3-methylglutaryl carnitine (2)                        | 0,83366 | 0       |
| phenol sulfate                                        | 0,82708 | 0       |
| phenylacetylglutamate                                 | 0,80726 | 0       |
| deoxycholic acid 12-sulfate*                          | 0,80636 | 0       |
| 1-palmitoyl-2-oleoyl-GPE (16:0/18:1)                  | 0,7978  | 0       |
| glutamine conjugate of C6H10O2 (2)*                   | 0,79223 | 0       |
| palmitoyl-docosahexaenoyl-glycerol (16:0/22:6) [1]*   | 0,79197 | 0       |
| cholic acid glucuronide                               | 0,78976 | 0,00001 |
| 1-carboxyethyltyrosine                                | 0,7836  | 0       |
| glucuronide of C14H22O4 (2)*                          | 0,77253 | 0       |
| oleoyl-arachidonoyl-glycerol (18:1/20:4) [2]*         | 0,77116 | 0       |

|                                                     |         |         |
|-----------------------------------------------------|---------|---------|
| N2,N5-diacetyloronithine                            | 0,76064 | 0       |
| formiminoglutamate                                  | 0,74487 | 0       |
| oleoyl-arachidonoyl-glycerol (18:1/20:4) [1]*       | 0,73669 | 0       |
| 1-palmitoyl-2-docosahexaenoyl-GPE (16:0/22:6)*      | 0,73374 | 0       |
| palmitoyl-linoleoyl-glycerol (16:0/18:2) [2]*       | 0,73276 | 0       |
| ursodeoxycholate                                    | 0,72289 | 0,00038 |
| 1-stearoyl-2-docosahexaenoyl-GPE (18:0/22:6)*       | 0,72277 | 0       |
| palmitoleoyl-arachidonoyl-glycerol (16:1/20:4) [2]* | 0,70893 | 0       |
| linoleoyl-docosahexaenoyl-glycerol (18:2/22:6) [1]* | 0,69969 | 0       |
| fructosyllsine                                      | 0,69366 | 0       |
| 11beta-hydroxyandrosterone glucuronide              | 0,69273 | 0       |
| glycoursodeoxycholic acid sulfate (1)               | 0,69131 | 0,00295 |
| N-acetylhomocitrulline                              | 0,67585 | 0       |
| 1-oleoyl-2-linoleoyl-GPE (18:1/18:2)*               | 0,67347 | 0       |
| trigonelline (N'-methylnicotinate)                  | 0,66254 | 0,00033 |
| 2,3-dihydroxy-2-methylbutyrate                      | 0,66049 | 0       |
| oleoyl-oleoyl-glycerol (18:1/18:1) [2]*             | 0,65751 | 0       |
| oleoyl-oleoyl-glycerol (18:1/18:1) [1]*             | 0,65336 | 0       |
| 1-stearoyl-2-linoleoyl-GPE (18:0/18:2)*             | 0,64908 | 0       |
| linoleoyl-arachidonoyl-glycerol (18:2/20:4) [1]*    | 0,64195 | 0       |
| isoursodeoxycholate                                 | 0,62945 | 0,01067 |
| chenodeoxycholate                                   | 0,62623 | 0,00003 |
| glutamine conjugate of C7H12O2*                     | 0,62547 | 0       |
| 1-palmitoyl-2-linoleoyl-GPE (16:0/18:2)             | 0,62293 | 0       |
| 1-palmitoyl-2-arachidonoyl-GPE (16:0/20:4)*         | 0,62279 | 0       |
| linoleoyl-arachidonoyl-glycerol (18:2/20:4) [2]*    | 0,62022 | 0       |
| cystathionine                                       | 0,61072 | 0       |
| l-urobilinogen                                      | 0,60637 | 0,00001 |
| palmitoyl-linoleoyl-glycerol (16:0/18:2) [1]*       | 0,60243 | 0       |
| 3-methylglutaconate                                 | 0,59493 | 0       |
| isoursodeoxycholate sulfate (1)                     | 0,59088 | 0       |
| trimethylamine N-oxide                              | 0,58957 | 0       |
| lithocholate sulfate (1)                            | 0,58723 | 0,00001 |
| dopamine 4-sulfate                                  | 0,57323 | 0       |
| gulonate*                                           | 0,56995 | 0       |
| prolylglycine                                       | 0,55833 | 0       |
| 1-ribosyl-imidazoleacetate*                         | 0,55782 | 0       |
| xylose                                              | 0,55502 | 0,00006 |
| maltose                                             | 0,54784 | 0       |
| diacylglycerol (16:1/18:2 [2], 16:0/18:3 [1])*      | 0,54033 | 0       |
| 5alpha-androstan-3alpha,17beta-diol disulfate       | 0,53746 | 0,00021 |

|                                                  |         |         |
|--------------------------------------------------|---------|---------|
| glutamine conjugate of C6H10O2 (1)*              | 0,5369  | 0       |
| 1-stearoyl-2-arachidonoyl-GPE (18:0/20:4)        | 0,53519 | 0       |
| 11beta-hydroxyetiocholanolone glucuronide*       | 0,52942 | 0,00057 |
| glucose                                          | 0,52554 | 0       |
| ribonate                                         | 0,51989 | 0       |
| phenylacetylglutamine                            | 0,51774 | 0       |
| lanthionine                                      | 0,51647 | 0       |
| 1-methyl-5-imidazolelactate                      | 0,5102  | 0,00332 |
| linoleoyl-linoleoyl-glycerol (18:2/18:2) [1]*    | 0,50353 | 0       |
| docosatrienoate (22:3n6)*                        | 0,50351 | 0       |
| linoleoyl-linolenoyl-glycerol (18:2/18:3) [1]*   | 0,50182 | 0,00053 |
| methylsuccinoylcarnitine                         | 0,49641 | 0,00015 |
| ascorbic acid 3-sulfate*                         | 0,49151 | 0       |
| dopamine 3-O-sulfate                             | 0,4814  | 0       |
| tetrahydrocortisol glucuronide                   | 0,47898 | 0       |
| oleoyl-linoleoyl-glycerol (18:1/18:2) [2]        | 0,47233 | 0       |
| palmitoleoyl-linoleoyl-glycerol (16:1/18:2) [1]* | 0,47034 | 0       |
| (S)-3-hydroxybutyrylcarnitine                    | 0,46816 | 0       |
| N-acetylcitrulline                               | 0,46526 | 0,00038 |
| picolinoylglycine                                | 0,46322 | 0       |
| galactonate                                      | 0,46207 | 0,00001 |
| alpha-ketobutyrate                               | 0,46176 | 0       |
| oleoyl-linoleoyl-glycerol (18:1/18:2) [1]        | 0,45763 | 0       |
| pipecolate                                       | 0,45293 | 0       |
| glucuronate                                      | 0,44517 | 0       |
| N,N,N-trimethyl-5-aminovalerate                  | 0,44123 | 0       |
| L-urobilin                                       | 0,43914 | 0,00055 |
| fructose                                         | 0,43428 | 0       |
| 1-stearoyl-GPG (18:0)                            | 0,43412 | 0       |
| hydantoin-5-propionate                           | 0,4339  | 0       |
| chenodeoxycholic acid 24-glucuronide             | 0,43377 | 0,00082 |
| stearoyl-arachidonoyl-glycerol (18:0/20:4) [1]*  | 0,4327  | 0       |
| palmitoleoyl-oleoyl-glycerol (16:1/18:1) [2]*    | 0,4311  | 0       |
| 8-methoxykynurenate                              | 0,42149 | 0,00004 |
| 3-methyladipate                                  | 0,41326 | 0,00005 |
| N-acetyltaurine                                  | 0,41221 | 0       |
| palmitoleoyl-oleoyl-glycerol (16:1/18:1) [1]*    | 0,40803 | 0,00001 |
| alpha-hydroxyisovalerate                         | 0,40765 | 0       |
| pyridoxate                                       | 0,39576 | 0,00007 |
| gamma-glutamylglutamate                          | 0,39543 | 0       |
| acisoga                                          | 0,39519 | 0       |

|                                              |         |         |
|----------------------------------------------|---------|---------|
| androstenediol (3beta,17beta) disulfate (1)  | 0,39334 | 0,00007 |
| glutarate (C5-DC)                            | 0,38581 | 0,00007 |
| methionine sulfone                           | 0,3846  | 0       |
| 3-hydroxysebacate                            | 0,38347 | 0,01039 |
| gentisate                                    | 0,38335 | 0,00001 |
| erythronate*                                 | 0,38174 | 0       |
| N-acetyl-1-methylhistidine*                  | 0,3704  | 0,00042 |
| N-acetyl-cadaverine                          | 0,37017 | 0,01996 |
| mannose                                      | 0,36985 | 0       |
| glutamate                                    | 0,36433 | 0       |
| hydroxy-N6,N6,N6-trimethyllysine*            | 0,35922 | 0       |
| 2-stearoyl-GPE (18:0)*                       | 0,35653 | 0       |
| alpha-hydroxycaproate                        | 0,35503 | 0,00002 |
| 2-hydroxy-3-methylvalerate                   | 0,35491 | 0       |
| cytosine                                     | 0,35434 | 0,00001 |
| 4-acetamidobutanoate                         | 0,35334 | 0,00012 |
| 2-hydroxy-4-(methylthio)butanoic acid        | 0,35198 | 0       |
| N-carbamoylalanine                           | 0,3485  | 0,00003 |
| N-acetylneuraminate                          | 0,34461 | 0       |
| 3-indoxyl sulfate                            | 0,34187 | 0       |
| 7-ketodeoxycholate                           | 0,33577 | 0,04357 |
| N6-succinyladenosine                         | 0,33327 | 0       |
| N-stearoyl-sphinganine (d18:0/18:0)*         | 0,33257 | 0       |
| gamma-glutamylisoleucine*                    | 0,33247 | 0       |
| succinylcarnitine (C4-DC)                    | 0,3322  | 0       |
| 2-aminoadipate                               | 0,33037 | 0       |
| adrenate (22:4n6)                            | 0,32861 | 0       |
| cyclo(leu-pro)                               | 0,32827 | 0,00188 |
| 1-methyl-4-imidazoleacetate                  | 0,3274  | 0,00001 |
| phenylacetylcarnitine                        | 0,32498 | 0,00089 |
| 5alpha-androstan-3beta,17beta-diol disulfate | 0,32134 | 0,00393 |
| nisinate (24:6n3)                            | 0,32112 | 0,0005  |
| vanillactate                                 | 0,31915 | 0,00002 |
| 1-myristoylglycerol (14:0)                   | 0,31825 | 0,00002 |
| 2-hydroxybutyrate/2-hydroxyisobutyrate       | 0,31747 | 0       |
| 3-hydroxymyristate                           | 0,31739 | 0       |
| margarate (17:0)                             | 0,31629 | 0       |
| heneicosapentaenoate (21:5n3)                | 0,31121 | 0,01479 |
| beta-citrylglutamate                         | 0,31005 | 0       |
| 1-myristoyl-2-palmitoyl-GPC (14:0/16:0)      | 0,30938 | 0       |
| tetrahydrocortisone glucuronide (5)          | 0,30908 | 0       |

|                                                                     |         |         |
|---------------------------------------------------------------------|---------|---------|
| docosapentaenoate (n3 DPA; 22:5n3)                                  | 0,30855 | 0       |
| ceramide (d16:1/24:1, d18:1/22:1)*                                  | 0,30472 | 0       |
| pyruvate                                                            | 0,30432 | 0       |
| erucate (22:1n9)                                                    | 0,30229 | 0       |
| hexanoylglutamine                                                   | 0,30103 | 0,00164 |
| 2-oxoarginine*                                                      | 0,3007  | 0,00005 |
| arabitol/xylitol                                                    | 0,30028 | 0       |
| 11-ketoetiocholanolone glucuronide                                  | 0,30001 | 0,00013 |
| N2-acetyl,N6,N6-dimethyllysine                                      | 0,29883 | 0,00766 |
| N-carbamoylvaline                                                   | 0,29812 | 0,00001 |
| gamma-CEHC glucuronide*                                             | 0,29702 | 0       |
| glycolithocholate sulfate*                                          | 0,29545 | 0,00443 |
| 1-palmitoyl-2-palmitoleoyl-GPC (16:0/16:1)*                         | 0,29288 | 0       |
| N-stearoyl-sphingosine (d18:1/18:0)*                                | 0,2899  | 0       |
| carnitine of C10H14O2 (5)*                                          | 0,28812 | 0,00004 |
| 3,4-dihydroxybutyrate                                               | 0,28519 | 0       |
| 2-aminoheptanoate                                                   | 0,27973 | 0       |
| maleate                                                             | 0,27746 | 0       |
| gamma-tocopherol/beta-tocopherol                                    | 0,27655 | 0       |
| 1-oleoyl-GPE (18:1)                                                 | 0,27552 | 0       |
| 2,3-dihydroxy-5-methylthio-4-pentenoate (DMTPA)*                    | 0,27371 | 0       |
| 3-hydroxyadipate                                                    | 0,26694 | 0,002   |
| linoleoyl-linoleoyl-glycerol (18:2/18:2) [2]*                       | 0,26635 | 0,0201  |
| 1-palmitoyl-GPG (16:0)*                                             | 0,26459 | 0       |
| lactate                                                             | 0,2631  | 0       |
| tetrahydrocortisol sulfate (1)                                      | 0,26184 | 0,00293 |
| gamma-glutamylvaline                                                | 0,26128 | 0       |
| xanthosine                                                          | 0,26113 | 0,00019 |
| eicosenedioate (C20:1-DC)*                                          | -0,2661 | 0,01156 |
| 1-(1-enyl-palmitoyl)-2-palmitoleoyl-GPC (P-16:0/16:1)*              | -0,2668 | 0       |
| beta-cryptoxanthin                                                  | -0,2762 | 0,01678 |
| sphingomyelin (d18:2/18:1)*                                         | -0,2794 | 0       |
| pregnenediol sulfate (C21H34O5S)*                                   | -0,2798 | 0,00015 |
| branched-chain, straight-chain, or cyclopropyl 10:1 fatty acid (1)* | -0,2837 | 0,00005 |
| glycosyl ceramide (d18:1/23:1, d17:1/24:1)*                         | -0,2857 | 0       |
| androstenediol (3alpha, 17alpha) monosulfate (2)                    | -0,291  | 0,0002  |
| eicosapentaenoylcholine                                             | -0,2913 | 0,00052 |



|                                                     |              |                  |
|-----------------------------------------------------|--------------|------------------|
| sphingomyelin (d18:1/22:2, d18:2/22:1, d16:1/24:2)* | -0,2919      | 0                |
| androsterone glucuronide                            | -0,3029      | 0,0026           |
| docosahexaenoylcholine                              | -0,3101      | 0                |
| pregnenolone sulfate                                | -0,3108      | 0,00027          |
| oleoylcholine                                       | -0,3201      | 0                |
| arachidonoylcholine                                 | -0,3254      | 0                |
| glycosyl ceramide (d18:2/24:1, d18:1/24:2)*         | -0,3268      | 0                |
| sphingomyelin (d18:2/14:0, d18:1/14:1)*             | -0,33        | 0                |
| N-stearoylserine*                                   | -0,3377      | 0                |
| tauroolithocholate 3-sulfate                        | -0,3491      | 0,02194          |
| palmitoylcholine                                    | -0,352       | 0                |
| sphingomyelin (d18:2/24:2)*                         | -0,3532      | 0                |
| palmitoloelycholine                                 | -0,3567      | 0                |
| sphingomyelin (d18:1/20:2, d18:2/20:1, d16:1/22:2)* | -0,3594      | 0                |
| estrone 3-sulfate                                   | -0,364       | 0,01641          |
| stearoylcholine*                                    | -0,3769      | 0                |
| hydroxy-CMPF*                                       | -0,4001      | 0,00307          |
| dihomo-linolenoyl-choline                           | -0,4248      | 0                |
| linoleoylcholine*                                   | -0,4302      | 0                |
| 5alpha-pregnan-3beta-ol,20-one sulfate              | -0,4997      | 0,02831          |
| cysteine-glutathione disulfide                      | -0,5088      | 0                |
| taurocholenate sulfate*                             | -0,5279      | 0                |
| tryptophan betaine                                  | -0,5388      | 0,00007          |
| N-methylproline                                     | -0,6043      | 0,00467          |
| N,N-dimethylalanine                                 | -0,6853      | 0                |
| 1,5-anhydroglucitol (1,5-AG)                        | -0,726       | 0                |
| pregnanolone/allopregnanolone sulfate               | -0,9053      | 0,00766          |
| pregnenediol-3-glucuronide                          | -0,9979      | 0,0022           |
| 5alpha-pregnan-3beta,20alpha-diol disulfate         | -1,2436      | 0,00027          |
| 5alpha-pregnan-diol disulfate                       | -1,3543      | 0,00003          |
| 5alpha-pregnan-3beta,20beta-diol monosulfate (1)    | -1,4083      | 0,00052          |
| 5alpha-pregnan-3beta,20alpha-diol monosulfate (2)   | -1,4689      | 0,00241          |
| <b>Cluster liver specific vs Cluster Control(F)</b> |              |                  |
| <b>METABOLITE_NAME</b>                              | <b>logFC</b> | <b>adj.P.Val</b> |
| 5alpha-androstan-3alpha,17beta-diol monosulfate (2) | 1,44418      | 0,01061          |

|                                                       |         |         |
|-------------------------------------------------------|---------|---------|
| glycoursodeoxycholic acid sulfate (1)                 | 1,25432 | 0,00011 |
| 5alpha-androstan-3alpha,17beta-diol disulfate         | 0,81785 | 0,00005 |
| taurochenodeoxycholic acid 3-sulfate                  | 0,80603 | 0,00327 |
| ursodeoxycholate                                      | 0,75216 | 0,01382 |
| glycochenodeoxycholate glucuronide (1)                | 0,71616 | 0,01952 |
| formiminoglutamate                                    | 0,65741 | 0       |
| glycochenodeoxycholate 3-sulfate                      | 0,61835 | 0,0009  |
| deoxycholic acid glucuronide                          | 0,53847 | 0,02732 |
| tauroursodeoxycholic acid sulfate (1)                 | 0,52661 | 0,01061 |
| diacylglycerol (12:0/18:1, 14:0/16:1, 16:0/14:1) [2]* | 0,46551 | 0,00361 |
| GlcNAc sulfate conjugate of C21H34O2 steroid**        | 0,41607 | 0,00403 |
| heneicosapentaenoate (21:5n3)                         | 0,41479 | 0,03322 |
| 1-carboxyethylisoleucine                              | 0,39559 | 0,00193 |
| palmitoyl-oleoyl-glycerol (16:0/18:1) [1]*            | 0,38874 | 0,00484 |
| palmitoyl-docosahexaenoyl-glycerol (16:0/22:6) [1]*   | 0,38772 | 0,01061 |
| 1-carboxyethylleucine                                 | 0,37986 | 0,00005 |
| 1-stearoyl-2-oleoyl-GPI (18:0/18:1)*                  | 0,37323 | 0       |
| 2-oxoarginine*                                        | 0,37279 | 0,00043 |
| diacylglycerol (14:0/18:1, 16:0/16:1) [2]*            | 0,36051 | 0,03741 |
| palmitoyl-oleoyl-glycerol (16:0/18:1) [2]*            | 0,35926 | 0,00592 |
| hexadecanedioate (C16-DC)                             | 0,34721 | 0,00037 |
| 1-carboxyethylphenylalanine                           | 0,34223 | 0,00142 |
| 2-hydroxy-3-methylvalerate                            | 0,33938 | 0,00245 |
| xanthine                                              | 0,32709 | 0,00064 |
| diacylglycerol (14:0/18:1, 16:0/16:1) [1]*            | 0,3246  | 0,02462 |
| 1-carboxyethylvaline                                  | 0,32419 | 0,0052  |
| behenoyl dihydrosphingomyelin (d18:0/22:0)*           | 0,31784 | 0       |
| picolinate                                            | 0,31071 | 0,00003 |
| myristoyl-linoleoyl-glycerol (14:0/18:2) [1]*         | 0,30623 | 0,04156 |
| octadecanedioylcarnitine (C18-DC)*                    | 0,30016 | 0,00056 |
| palmitoyl-linoleoyl-glycerol (16:0/18:2) [2]*         | 0,28879 | 0,01739 |
| glycocholenate sulfate*                               | 0,2834  | 0,00002 |
| sedoheptulose                                         | 0,28264 | 0,01473 |
| 4-hydroxyglutamate                                    | 0,27966 | 0,0011  |
| 1-stearoyl-2-oleoyl-GPE (18:0/18:1)                   | 0,2665  | 0,01709 |
| 2-aminoadipate                                        | 0,26056 | 0       |
| N-acetylmethionine                                    | -0,2625 | 0       |
| cysteine-glutathione disulfide                        | -0,3057 | 0,03    |

**Molecular features that were differentially expressed between type 2 diabetes and non-T2D groups, and between cardiometabolic and control cluster (G)**

| Liver Gene | T2D group vs nonT2D group | Cardiometabolic cluster vs Control cluster |
|------------|---------------------------|--------------------------------------------|
| A1CF       | X                         | X                                          |
| AADAT      | X                         | X                                          |
| AASS       | X                         |                                            |
| ABCC4      |                           | X                                          |
| ABCG5      |                           | X                                          |
| ABLIM1     |                           | X                                          |
| ACADSB     | X                         | X                                          |
| ACAT2      | X                         | X                                          |
| ACLY       | X                         | X                                          |
| ACOX2      | X                         | X                                          |
| ACP5       |                           | X                                          |
| ACSS3      | X                         | X                                          |
| ADAMTSL3   |                           | X                                          |
| AGMO       |                           | X                                          |
| AGXT       |                           | X                                          |
| AGXT2      |                           | X                                          |
| AKR1B10    | X                         | X                                          |
| AKR1B15    | X                         | X                                          |
| AKR1C3     |                           | X                                          |
| ALAS1      |                           | X                                          |
| ALDH1L1    |                           | X                                          |
| ALDH3A1    |                           | X                                          |
| ALDOC      | X                         | X                                          |
| ALPL       | X                         | X                                          |
| ANG        |                           | X                                          |
| ANKRD18A   | X                         | X                                          |
| ANKRD18B   | X                         | X                                          |
| ANKRD18CP  | X                         |                                            |
| ANKRD29    |                           | X                                          |
| ANKS1B     | X                         |                                            |
| ANKUB1     | X                         |                                            |
| ANTXR1     |                           | X                                          |
| ANXA2P1    |                           | X                                          |

|             |   |   |
|-------------|---|---|
| ANXA2P2     | X | X |
| AOC4P       | X | X |
| APOF        | X | X |
| APOM        |   | X |
| ARHGAP10    | X | X |
| ARPC5L      | X | X |
| ARRDC3      |   | X |
| ARSD        | X | X |
| ASPN        |   | X |
| ATP6V1F     | X |   |
| ATP9A       | X | X |
| AZGP1       |   | X |
| BPIFB1      |   | X |
| C1orf198    |   | X |
| C3orf85     |   | X |
| C3P1        | X | X |
| C4B         |   | X |
| C6          |   | X |
| C8A         |   | X |
| C8B         |   | X |
| CA14        | X |   |
| CACTIN-AS1  |   | X |
| CAP2        |   | X |
| CAPN12      | X | X |
| CAPN2       |   | X |
| CASTOR2     |   | X |
| CCDC71L     | X |   |
| CCL15-CCL14 |   | X |
| CCL20       | X | X |
| CCND1       | X | X |
| CCR1        |   | X |
| CD163L1     |   | X |
| CD3E        | X |   |
| CD4         | X | X |
| CD82        | X | X |
| CDH1        | X |   |
| CDKN1A      |   | X |
| CEP170B     | X |   |
| CEP89       |   | X |
| CES1        | X | X |
| CETN2       |   | X |

|            |   |   |
|------------|---|---|
| CETP       | X | X |
| CFAP298    |   | X |
| CFHR5      | X | X |
| CHI3L1     | X | X |
| CKS2       | X | X |
| CLEC4M     | X | X |
| CLPTM1L    |   | X |
| CNPPD1     |   | X |
| COLEC10    |   | X |
| COX10-AS1  | X |   |
| CPA3       |   | X |
| CPEB4      |   | X |
| CPN1       | X | X |
| CPNE6      | X |   |
| CPS1-IT1   | X | X |
| CPT1B      | X | X |
| CPVL       |   | X |
| CSTA       | X | X |
| CSTB       |   | X |
| CUTC       | X |   |
| CXADR      | X | X |
| CXCL10     |   | X |
| CXCL9      | X | X |
| CXCR2P1    | X | X |
| CYP1A2     | X |   |
| CYP2C19    | X | X |
| CYP2C8     | X | X |
| CYP3A43    | X |   |
| CYP51A1    | X | X |
| DAZ4       | X |   |
| DBX1       |   | X |
| DCBLD2     |   | X |
| DCPS       | X | X |
| DDB2       | X | X |
| DDX3Y      | X |   |
| DEFB1      | X | X |
| DHCR7      | X | X |
| DLAT       |   | X |
| DLGAP1-AS3 |   | X |
| DNAJC12    | X | X |
| DNAJC6     | X |   |

|          |   |   |
|----------|---|---|
| DOK6     | X | X |
| DPYD     | X | X |
| DPYSL2   |   | X |
| DTNA     | X | X |
| DYNLT1   | X |   |
| EBP      | X | X |
| EEF1A2   |   | X |
| EFNA1    |   | X |
| EHD4     |   | X |
| EIF1AY   | X | X |
| ENO3     | X |   |
| ENPEP    | X | X |
| EPCAM    | X |   |
| EPHA3    |   | X |
| ERG28    | X | X |
| ERVK-7   |   | X |
| ESPN     |   | X |
| ESR1     |   | X |
| ESRRG    | X |   |
| ETFA     |   | X |
| EXT1     | X | X |
| FABP4    |   | X |
| FABP5    | X | X |
| FAM151A  | X | X |
| FASN     |   | X |
| FBXO32   |   | X |
| FBXW11   |   | X |
| FCN2     | X | X |
| FDFT1    | X | X |
| FDXR     | X | X |
| FGB      |   | X |
| FGF2     |   | X |
| FGF21    | X |   |
| FNDC1    | X |   |
| FNDC3A   |   | X |
| FRMD4B   | X | X |
| FST      | X |   |
| GABRE    | X |   |
| GALK1    |   | X |
| GAS6     | X | X |
| GAS6-AS1 | X | X |

|             |   |   |
|-------------|---|---|
| GCH1        |   | X |
| GDF5        | X | X |
| GGH         |   | X |
| GIMAP7      | X |   |
| GNL2        |   | X |
| GNMT        | X | X |
| GPBP1L1     |   | X |
| GPR82       |   | X |
| GPX2        | X |   |
| GRTP1       |   | X |
| GSTA7P      |   | X |
| GUCA2B      | X | X |
| HAAO        |   | X |
| HAO2        |   | X |
| HERC5       | X |   |
| HKDC1       | X | X |
| HLA-E       |   | X |
| HMGCS1      | X | X |
| HNRNPA1     |   | X |
| HNRNPH3     |   | X |
| HOMER2      |   | X |
| HS3ST3A1    | X |   |
| HSD11B1     |   | X |
| HSD17B7P2   |   | X |
| HSPA4L      | X | X |
| HULC        | X |   |
| HYDIN       |   | X |
| IDH2        | X | X |
| IDNK        |   | X |
| IDO2        |   | X |
| IKBKE       |   | X |
| IL32        | X | X |
| IL7R        | X |   |
| INHBE       | X |   |
| INMT-MINDY4 | X | X |
| INSIG1      | X | X |
| ITGBL1      | X | X |
| JUNB        | X |   |
| JUND        |   | X |
| KCNE3       | X | X |
| KDELR3      | X | X |

|              |   |   |
|--------------|---|---|
| KDM5D        | X | X |
| KDM6A        |   | X |
| KLF3         |   | X |
| KRT6A        | X | X |
| KRT6C        | X | X |
| KRT75        | X | X |
| KRT79        | X | X |
| KRT84        | X |   |
| LAPTM4B      |   | X |
| LDLR         | X | X |
| LGALS2       | X |   |
| LGALS4       | X | X |
| LIN28B       |   | X |
| LINC01554    | X | X |
| LINC01588    | X |   |
| LINC02291    |   | X |
| LINC02396    |   | X |
| LINC02432    | X |   |
| LOC100422781 |   | X |
| LOC101927136 | X | X |
| LOC105369360 | X |   |
| LOC730101    | X |   |
| LPL          | X | X |
| LRP6         |   | X |
| LRRCC1       | X |   |
| LSS          | X | X |
| LUM          | X | X |
| MACO1        |   | X |
| MAP2K1       |   | X |
| MAP4         | X | X |
| MAP4K4       | X | X |
| MAPKAPK3     | X | X |
| MARC2        | X | X |
| MARCH1       |   | X |
| MBNL3        |   | X |
| MCL1         | X |   |
| MET          | X | X |
| MIR101-2     | X |   |
| MIR505       |   | X |
| MIR622       | X | X |
| MIR644A      |   | X |



|        |   |   |
|--------|---|---|
| MMAB   | X |   |
| MMP14  |   | X |
| MOGAT3 | X |   |
| MPC2   |   | X |
| MPV17L |   | X |
| MS4A14 |   | X |
| MSN    | X | X |
| MT1A   | X | X |
| MT1B   |   | X |
| MT1DP  |   | X |
| MT1E   |   | X |
| MT1F   | X | X |
| MT1G   | X | X |
| MT1H   |   | X |
| MT1IP  |   | X |
| MT1JP  |   | X |
| MT1M   | X | X |
| MT3    |   | X |
| MTFP1  |   | X |
| MVD    | X | X |
| MYH11  | X |   |
| MYL12B |   | X |
| MYO9A  |   | X |
| NAAA   | X | X |
| NAP1L1 |   | X |
| NAT8L  |   | X |
| NCAM2  |   | X |
| NEK8   |   | X |
| NHSL1  |   | X |
| NID2   | X | X |
| NLRP9  |   | X |
| NME1   | X |   |
| NOS2   |   | X |
| NPC1L1 |   | X |
| NPM2   | X | X |
| NPR3   | X |   |
| NR1I3  |   | X |
| NRN1   | X | X |
| NSDHL  | X | X |
| NT5E   | X | X |
| NTN4   | X | X |

|         |   |   |
|---------|---|---|
| OAT     | X | X |
| ODC1    | X | X |
| OLFM2   | X | X |
| OSBPL2  | X |   |
| P2RX5   |   | X |
| P2RY13  | X |   |
| P4HA1   | X |   |
| PADI1   |   | X |
| PAFAH2  |   | X |
| PAIP2B  | X | X |
| PCCB    | X | X |
| PCDH12  |   | X |
| PCNT    |   | X |
| PCOLCE  |   | X |
| PDIA5   | X |   |
| PDP2    |   | X |
| PEPD    | X | X |
| PER2    |   | X |
| PGLYRP2 |   | X |
| PHPT1   |   | X |
| PIEZO1  | X | X |
| PINK1   | X | X |
| PLCB1   | X | X |
| PLIN1   | X |   |
| PLK2    |   | X |
| PLN     | X | X |
| PLXNA4  |   | X |
| PNPLA4  |   | X |
| PODN    | X | X |
| PON1    | X | X |
| POSTN   | X | X |
| PPA1    |   | X |
| PPP1R1A | X | X |
| PRDX5   |   | X |
| PRKAA2  | X | X |
| PRKAG1  |   | X |
| PRRG4   |   | X |
| PRXL2A  |   | X |
| PTGDS   | X | X |
| PTPN11  |   | X |
| PTPRD   | X | X |

|          |   |   |
|----------|---|---|
| PURPL    | X | X |
| PYGB     | X | X |
| PZP      | X | X |
| RAI14    |   | X |
| RALGDS   | X | X |
| RBM24    |   | X |
| RBP5     |   | X |
| RELN     |   | X |
| RETREG1  |   | X |
| RGCC     |   | X |
| RGMA     |   | X |
| RGS5     | X | X |
| RPS27L   | X | X |
| RPS4Y1   | X | X |
| RRM2B    |   | X |
| RSBN1L   |   | X |
| RSU1     |   | X |
| RXYLT1   |   | X |
| SARDH    |   | X |
| SC5D     | X | X |
| SCARNA17 |   | X |
| SCARNA4  | X |   |
| SCARNA9L |   | X |
| SCCPDH   |   | X |
| SCD      | X | X |
| SCPEP1   | X |   |
| SDC2     |   | X |
| SERPINA1 | X | X |
| SERPINE1 | X |   |
| SERTM2   | X |   |
| SGCE     | X | X |
| SGO2     |   | X |
| SH3BP5L  | X | X |
| SHISA4   |   | X |
| SIPA1L2  |   | X |
| SIRT5    |   | X |
| SKAP2    |   | X |
| SKP2     |   | X |
| SLC16A13 | X |   |
| SLC22A1  | X |   |
| SLC22A10 | X | X |

|          |   |   |
|----------|---|---|
| SLC22A3  |   | X |
| SLC27A2  |   | X |
| SLC6A13  | X | X |
| SLC9A9   |   | X |
| SLCO1B7  | X | X |
| SLCO4C1  | X | X |
| SNORA14A | X | X |
| SNORA14B | X |   |
| SNORA28  | X |   |
| SNORD62A | X |   |
| SNORD62B | X |   |
| SNORD70  | X | X |
| SNTB1    |   | X |
| SNX10    | X | X |
| SORD     |   | X |
| SPATA18  | X | X |
| SPICE1   |   | X |
| SPINK1   | X | X |
| SPINK4   |   | X |
| SPP1     | X | X |
| SPP2     |   | X |
| SREBF2   | X | X |
| SRPX2    |   | X |
| STAT3    | X |   |
| STMN2    | X | X |
| STOM     | X | X |
| STX3     |   | X |
| SULF2    | X | X |
| SULT1C2  | X | X |
| SULT1E1  | X |   |
| SUSD2    |   | X |
| TANGO6   |   | X |
| TCP10L2  | X | X |
| TEF      |   | X |
| TESK2    |   | X |
| TFF3     | X |   |
| TFPI2    | X | X |
| THBS1    | X |   |
| TIMD4    | X | X |
| TIMP1    | X | X |
| TMED6    | X | X |

|           |   |   |
|-----------|---|---|
| TMEM132C  |   | X |
| TMEM154   | X |   |
| TMEM45B   | X |   |
| TMEM92    | X | X |
| TMTC1     | X | X |
| TNFAIP3   | X | X |
| TNFRSF10A |   | X |
| TNFRSF10D |   | X |
| TNIP1     |   | X |
| TNNC1     |   | X |
| TOB1      | X |   |
| TP53I3    | X | X |
| TRIM35    |   | X |
| TTY14     | X | X |
| TUBE1     |   | X |
| TWSG1     |   | X |
| TXNRD1    |   | X |
| TYMS      | X | X |
| UGT2A2    |   | X |
| USP22     | X | X |
| USP9Y     | X | X |
| UTY       | X | X |
| VAMP5     |   | X |
| VCAM1     | X | X |
| VCAN      | X | X |
| VIL1      | X | X |
| VTRNA1-1  |   | X |
| WDPCP     |   | X |
| WDR72     | X |   |
| WNK3      | X | X |
| XIST      | X | X |
| XRCC5     |   | X |
| ZBTB32    |   | X |
| ZFP1      |   | X |
| ZFP36     |   | X |
| ZG16      | X | X |
| ZKSCAN1   |   | X |
| ZMAT3     | X | X |
| ZNF16     |   | X |
| ZNF329    |   | X |

| liver gene pathways                                                                                                       | T2D group vs nonT2D group | Cardiometabolic cluster vs Control cluster |
|---------------------------------------------------------------------------------------------------------------------------|---------------------------|--------------------------------------------|
| acetyl_coa_metabolic_process                                                                                              | X                         | X                                          |
| activation_of_immune_response                                                                                             |                           | X                                          |
| activation_of_protein_kinase_activity                                                                                     |                           | X                                          |
| acylglycerol_homeostasis                                                                                                  | X                         | X                                          |
| adaptive_immune_response                                                                                                  | X                         |                                            |
| adaptive_immune_response_based_on_somatic_recombination_of_immune_receptors_built_from_immunoglobulin_superfamily_domains | X                         | X                                          |
| adp_metabolic_process                                                                                                     | X                         | X                                          |
| alcohol_biosynthetic_process                                                                                              | X                         | X                                          |
| alcohol_catabolic_process                                                                                                 |                           | X                                          |
| alcohol_metabolic_process                                                                                                 | X                         | X                                          |
| alpha_amino_acid_catabolic_process                                                                                        | X                         | X                                          |
| alpha_amino_acid_metabolic_process                                                                                        | X                         | X                                          |
| amide_transport                                                                                                           | X                         |                                            |
| antimicrobial_humoral_immune_response_mediated_by_antimicrobial_peptide                                                   |                           | X                                          |
| antimicrobial_humoral_response                                                                                            |                           | X                                          |
| arachidonic_acid_metabolic_process                                                                                        |                           | X                                          |
| aspartate_family_amino_acid_metabolic_process                                                                             | X                         | X                                          |
| atp_metabolic_process                                                                                                     |                           | X                                          |
| b_cell_mediated_immunity                                                                                                  | X                         | X                                          |
| biological_process_involved_in_interaction_with_host                                                                      |                           | X                                          |
| carbohydrate_catabolic_process                                                                                            | X                         | X                                          |
| carbohydrate_derivative_transport                                                                                         | X                         |                                            |
| carbohydrate_homeostasis                                                                                                  | X                         |                                            |
| carbohydrate_transmembrane_transport                                                                                      | X                         |                                            |
| carbohydrate_transport                                                                                                    | X                         |                                            |
| carboxylic_acid_transport                                                                                                 | X                         |                                            |
| cell_chemotaxis                                                                                                           | X                         | X                                          |
| cell_matrix_adhesion                                                                                                      | X                         |                                            |
| cell_substrate_adhesion                                                                                                   | X                         |                                            |
| cell_substrate_junction_organization                                                                                      | X                         |                                            |
| cellular_amino_acid_biosynthetic_process                                                                                  | X                         | X                                          |
| cellular_amino_acid_catabolic_process                                                                                     | X                         | X                                          |
| cellular_amino_acid_metabolic_process                                                                                     | X                         | X                                          |
| cellular_carbohydrate_catabolic_process                                                                                   | X                         | X                                          |

|                                                     |   |   |
|-----------------------------------------------------|---|---|
| cellular_carbohydrate_metabolic_process             | X | X |
| cellular_glucan_metabolic_process                   |   | X |
| cellular_hormone_metabolic_process                  | X | X |
| cellular_ketone_metabolic_process                   | X |   |
| cellular_lipid_catabolic_process                    | X | X |
| cellular_nitrogen_compound_catabolic_process        | X |   |
| cellular_oxidant_detoxification                     |   | X |
| cellular_response_to_alcohol                        | X |   |
| cellular_response_to_cadmium_ion                    | X | X |
| cellular_response_to_calcium_ion                    | X | X |
| cellular_response_to_carbohydrate_stimulus          | X |   |
| cellular_response_to_chemical_stress                | X | X |
| cellular_response_to_corticosteroid_stimulus        | X |   |
| cellular_response_to_fatty_acid                     | X | X |
| cellular_response_to_inorganic_substance            | X | X |
| cellular_response_to_ketone                         | X | X |
| cellular_response_to_lipoprotein_particle_stimulus  | X | X |
| cellular_response_to_nutrient                       |   | X |
| cellular_response_to_reactive_oxygen_species        | X | X |
| cellular_response_to_toxic_substance                | X | X |
| cellular_response_to_xenobiotic_stimulus            | X | X |
| cellular_transition_metal_ion_homeostasis           |   | X |
| cholesterol_efflux                                  |   | X |
| complement_activation                               | X | X |
| demethylation                                       | X |   |
| detoxification                                      | X | X |
| dicarboxylic_acid_metabolic_process                 | X | X |
| diol_metabolic_process                              | X |   |
| dna_biosynthetic_process                            | X |   |
| endothelial_cell_apoptotic_process                  |   | X |
| endothelial_cell_development                        | X |   |
| energy_derivation_by_oxidation_of_organic_compounds | X | X |
| energy_homeostasis                                  | X |   |
| energy_reserve_metabolic_process                    |   | X |
| estrogen_metabolic_process                          | X | X |
| fatty_acid_biosynthetic_process                     | X | X |
| fatty_acid_metabolic_process                        | X | X |
| foam_cell_differentiation                           |   | X |
| focal_adhesion_assembly                             | X |   |
| generation_of_precursor_metabolites_and_energy      | X | X |

|                                                                |   |   |
|----------------------------------------------------------------|---|---|
| glucose_import                                                 | X |   |
| glutamate_metabolic_process                                    | X |   |
| glycerolipid_biosynthetic_process                              | X | X |
| glycerolipid_metabolic_process                                 | X | X |
| glycerophospholipid_metabolic_process                          |   | X |
| granulocyte_chemotaxis                                         | X | X |
| hemostasis                                                     | X | X |
| hormone_metabolic_process                                      | X | X |
| humoral_immune_response                                        | X | X |
| humoral_immune_response_mediated_by_circulating_immunoglobulin | X | X |
| hydrogen_peroxide_metabolic_process                            | X |   |
| intermembrane_lipid_transfer                                   |   | X |
| intestinal_absorption                                          |   | X |
| intracellular_lipid_transport                                  | X |   |
| intracellular_receptor_signaling_pathway                       |   | X |
| intracellular_sterol_transport                                 | X |   |
| isoprenoid_biosynthetic_process                                | X | X |
| isoprenoid_metabolic_process                                   | X | X |
| leukocyte_chemotaxis                                           | X | X |
| leukocyte_mediated_immunity                                    | X | X |
| leukocyte_migration                                            | X |   |
| lipid_catabolic_process                                        | X | X |
| lipid_homeostasis                                              | X | X |
| lipid_localization                                             | X | X |
| lipid_modification                                             | X | X |
| long_chain_fatty_acid_metabolic_process                        |   | X |
| lymphocyte_migration                                           | X |   |
| mitotic_g1_s_transition_checkpoint_signaling                   | X |   |
| monocarboxylic_acid_biosynthetic_process                       | X | X |
| monocarboxylic_acid_catabolic_process                          | X | X |
| mononuclear_cell_migration                                     | X |   |
| monosaccharide_biosynthetic_process                            | X |   |
| monosaccharide_metabolic_process                               | X | X |
| multicellular_organism_growth                                  | X | X |
| myeloid_leukocyte_migration                                    | X | X |
| negative_regulation_of_catabolic_process                       | X |   |
| negative_regulation_of_cellular_amide_metabolic_process        | X |   |
| negative_regulation_of_cellular_catabolic_process              | X |   |



|                                                                    |   |   |
|--------------------------------------------------------------------|---|---|
| negative_regulation_of_cellular_macromolecule_biosynthetic_process | X |   |
| negative_regulation_of_endothelial_cell_apoptotic_process          | X |   |
| negative_regulation_of_growth                                      |   | X |
| negative_regulation_of_lipid_biosynthetic_process                  | X |   |
| negative_regulation_of_oxidative_stress_induced_cell_death         | X |   |
| negative_regulation_of_peptidase_activity                          | X |   |
| negative_regulation_of_proteolysis                                 | X |   |
| negative_regulation_of_response_to_wounding                        |   | X |
| neurotransmitter_uptake                                            | X |   |
| neutral_lipid_biosynthetic_process                                 | X | X |
| neutral_lipid_metabolic_process                                    | X | X |
| neutrophil_chemotaxis                                              | X | X |
| neutrophil_migration                                               | X |   |
| nuclear_transcribed_mrna_catabolic_process                         | X |   |
| nucleobase_metabolic_process                                       |   | X |
| nucleoside_bisphosphate_metabolic_process                          | X | X |
| nucleoside_diphosphate_metabolic_process                           | X | X |
| nucleoside_phosphate_biosynthetic_process                          |   | X |
| nucleotide_phosphorylation                                         | X | X |
| olefinic_compound_metabolic_process                                |   | X |
| organic_acid_biosynthetic_process                                  | X | X |
| organic_acid_catabolic_process                                     | X | X |
| organic_anion_transport                                            | X |   |
| organic_cyclic_compound_catabolic_process                          | X | X |
| organic_hydroxy_compound_biosynthetic_process                      | X | X |
| organic_hydroxy_compound_catabolic_process                         | X | X |
| organic_hydroxy_compound_transport                                 | X | X |
| peptide_transport                                                  | X |   |
| phosphatidylcholine_metabolic_process                              | X | X |
| phospholipid_biosynthetic_process                                  | X | X |
| phospholipid_metabolic_process                                     | X | X |
| plasma_lipoprotein_particle_clearance                              |   | X |
| polyol_metabolic_process                                           | X |   |
| polysaccharide_metabolic_process                                   |   | X |
| positive_regulation_of_calcium_mediated_signaling                  | X |   |
| positive_regulation_of_catabolic_process                           | X |   |
| positive_regulation_of_chemotaxis                                  | X |   |
| positive_regulation_of_dna_biosynthetic_process                    | X | X |

|                                                                  |   |   |
|------------------------------------------------------------------|---|---|
| positive_regulation_of_epithelial_cell_migration                 | X |   |
| positive_regulation_of_glucose_import                            | X |   |
| positive_regulation_of_glucose_transmembrane_transport           | X |   |
| positive_regulation_of_immune_response                           |   | X |
| positive_regulation_of_kinase_activity                           | X | X |
| positive_regulation_of_leukocyte_chemotaxis                      | X |   |
| positive_regulation_of_leukocyte_migration                       | X |   |
| positive_regulation_of_lipid_biosynthetic_process                | X |   |
| positive_regulation_of_lipid_localization                        |   | X |
| positive_regulation_of_lipid_metabolic_process                   | X |   |
| positive_regulation_of_mapk_cascade                              | X |   |
| positive_regulation_of_posttranscriptional_gene_silencing        | X |   |
| positive_regulation_of_protein_kinase_activity                   |   | X |
| positive_regulation_of_protein_kinase_b_signaling                |   | X |
| positive_regulation_of_reactive_oxygen_species_metabolic_process |   | X |
| positive_regulation_of_response_to_external_stimulus             | X | X |
| positive_regulation_of_steroid_metabolic_process                 |   | X |
| positive_regulation_of_sterol_transport                          |   | X |
| primary_alcohol_metabolic_process                                | X | X |
| protein_containing_complex_remodeling                            | X | X |
| protein_lipid_complex_subunit_organization                       | X | X |
| protein_localization_to_plasma_membrane                          | X |   |
| purine_containing_compound_biosynthetic_process                  |   | X |
| purine_containing_compound_metabolic_process                     | X | X |
| pyruvate_metabolic_process                                       | X | X |
| reactive_oxygen_species_metabolic_process                        | X | X |
| receptor_recycling                                               | X |   |
| regulation_of_alcohol_biosynthetic_process                       | X |   |
| regulation_of_atp_metabolic_process                              |   | X |
| regulation_of_cell_matrix_adhesion                               | X |   |
| regulation_of_cell_substrate_junction_organization               | X |   |
| regulation_of_cellular_amide_metabolic_process                   | X |   |
| regulation_of_cholesterol_efflux                                 |   | X |
| regulation_of_cholesterol_metabolic_process                      | X | X |
| regulation_of_dna_biosynthetic_process                           | X | X |
| regulation_of_epithelial_cell_apoptotic_process                  |   | X |
| regulation_of_gene_silencing_by_rna                              | X |   |

|                                                              |   |   |
|--------------------------------------------------------------|---|---|
| regulation_of_generation_of_precursor_metabolites_and_energy |   | X |
| regulation_of_glucose_import                                 | X |   |
| regulation_of_glucose_transmembrane_transport                | X |   |
| regulation_of_hormone_levels                                 | X | X |
| regulation_of_intracellular_transport                        |   | X |
| regulation_of_leukocyte_chemotaxis                           | X |   |
| regulation_of_lipid_biosynthetic_process                     | X | X |
| regulation_of_lipid_localization                             |   | X |
| regulation_of_lipid_metabolic_process                        | X | X |
| regulation_of_lipid_transport                                |   | X |
| regulation_of_mononuclear_cell_migration                     | X |   |
| regulation_of_nucleotide_biosynthetic_process                |   | X |
| regulation_of_nucleotide_metabolic_process                   |   | X |
| regulation_of_oxidative_stress_induced_cell_death            | X |   |
| regulation_of_peptidase_activity                             | X |   |
| regulation_of_plasma_lipoprotein_particle_levels             | X | X |
| regulation_of_protein_catabolic_process                      | X |   |
| regulation_of_protein_localization_to_plasma_membrane        | X |   |
| regulation_of_reactive_oxygen_species_metabolic_process      |   | X |
| regulation_of_response_to_oxidative_stress                   | X |   |
| regulation_of_small_molecule_metabolic_process               | X | X |
| regulation_of_steroid_biosynthetic_process                   | X | X |
| regulation_of_steroid_metabolic_process                      | X | X |
| regulation_of_sterol_transport                               |   | X |
| regulation_of_triglyceride_metabolic_process                 | X |   |
| regulation_of_viral_process                                  |   | X |
| response_to_alcohol                                          | X |   |
| response_to_cadmium_ion                                      | X | X |
| response_to_calcium_ion                                      | X | X |
| response_to_carbohydrate                                     | X |   |
| response_to_chemokine                                        |   | X |
| response_to_copper_ion                                       | X | X |
| response_to_dexamethasone                                    |   | X |
| response_to_estrogen                                         | X |   |
| response_to_ethanol                                          | X |   |
| response_to_extracellular_stimulus                           | X | X |
| response_to_fatty_acid                                       | X | X |
| response_to_fluid_shear_stress                               | X |   |

|                                              |   |   |
|----------------------------------------------|---|---|
| response_to_ketone                           | X | X |
| response_to_metal_ion                        | X | X |
| response_to_molecule_of_bacterial_origin     | X |   |
| response_to_monosaccharide                   | X |   |
| response_to_nutrient                         | X | X |
| response_to_oxidative_stress                 | X |   |
| response_to_peptide                          | X |   |
| response_to_reactive_oxygen_species          | X |   |
| response_to_sterol                           | X | X |
| response_to_toxic_substance                  | X | X |
| response_to_uv                               | X |   |
| response_to_vitamin                          | X | X |
| response_to_x_ray                            |   | X |
| response_to_xenobiotic_stimulus              | X |   |
| response_to_zinc_ion                         | X | X |
| retinol_metabolic_process                    |   | X |
| rhythmic_process                             | X |   |
| ribonucleoside_diphosphate_metabolic_process | X | X |
| ribose_phosphate_biosynthetic_process        |   | X |
| ribose_phosphate_metabolic_process           | X | X |
| rna_catabolic_process                        | X |   |
| secondary_alcohol_metabolic_process          | X | X |
| secondary_metabolic_process                  | X |   |
| small_molecule_catabolic_process             | X | X |
| steroid_biosynthetic_process                 | X | X |
| steroid_metabolic_process                    | X | X |
| sterol_biosynthetic_process                  | X | X |
| sterol_homeostasis                           | X | X |
| sterol_metabolic_process                     | X | X |
| sterol_transport                             | X | X |
| sulfur_amino_acid_metabolic_process          | X |   |
| sulfur_compound_biosynthetic_process         | X | X |
| sulfur_compound_metabolic_process            | X | X |
| terpenoid_metabolic_process                  | X | X |
| thioester_biosynthetic_process               |   | X |
| thioester_metabolic_process                  | X | X |
| transcription_by_rna_polymerase_iii          |   | X |
| transition_metal_ion_homeostasis             | X | X |
| triglyceride_biosynthetic_process            | X | X |
| triglyceride_metabolic_process               | X | X |
| vascular_process_in_circulatory_system       |   | X |

|                                                        |                                  |                                                   |
|--------------------------------------------------------|----------------------------------|---------------------------------------------------|
| vasodilation                                           |                                  | X                                                 |
| vesicle_budding_from_membrane                          | X                                |                                                   |
| viral_genome_replication                               |                                  | X                                                 |
| viral_life_cycle                                       |                                  | X                                                 |
| wound_healing                                          | X                                |                                                   |
| xenobiotic_metabolic_process                           | X                                |                                                   |
| zinc_ion_homeostasis                                   | X                                | X                                                 |
| <b>Metabolites</b>                                     | <b>T2D group vs nonT2D group</b> | <b>Cardiometabolic cluster vs Control cluster</b> |
| (S)-3-hydroxybutyrylcarnitine                          | X                                | X                                                 |
| 1-(1-enyl-palmitoyl)-2-palmitoleoyl-GPC (P-16:0/16:1)* |                                  | X                                                 |
| 1-carboxyethylisoleucine                               | X                                | X                                                 |
| 1-carboxyethylleucine                                  | X                                | X                                                 |
| 1-carboxyethylphenylalanine                            | X                                | X                                                 |
| 1-carboxyethyltyrosine                                 | X                                | X                                                 |
| 1-carboxyethylvaline                                   | X                                | X                                                 |
| 1-methyl-4-imidazoleacetate                            |                                  | X                                                 |
| 1-methyl-5-imidazoleacetate                            |                                  | X                                                 |
| 1-methyl-5-imidazolelactate                            |                                  | X                                                 |
| 1-myristoyl-2-palmitoyl-GPC (14:0/16:0)                |                                  | X                                                 |
| 1-myristoylglycerol (14:0)                             |                                  | X                                                 |
| 1-oleoyl-2-linoleoyl-GPE (18:1/18:2)*                  | X                                | X                                                 |
| 1-oleoyl-GPE (18:1)                                    |                                  | X                                                 |
| 1-palmitoyl-2-arachidonoyl-GPE (16:0/20:4)*            | X                                | X                                                 |
| 1-palmitoyl-2-docosahexaenoyl-GPE (16:0/22:6)*         | X                                | X                                                 |
| 1-palmitoyl-2-linoleoyl-GPE (16:0/18:2)                | X                                | X                                                 |
| 1-palmitoyl-2-oleoyl-GPE (16:0/18:1)                   | X                                | X                                                 |
| 1-palmitoyl-2-palmitoleoyl-GPC (16:0/16:1)*            |                                  | X                                                 |
| 1-palmitoyl-GPG (16:0)*                                |                                  | X                                                 |
| 1-ribosyl-imidazoleacetate*                            | X                                | X                                                 |
| 1-stearoyl-2-arachidonoyl-GPE (18:0/20:4)              | X                                | X                                                 |
| 1-stearoyl-2-docosahexaenoyl-GPE (18:0/22:6)*          | X                                | X                                                 |
| 1-stearoyl-2-linoleoyl-GPE (18:0/18:2)*                | X                                | X                                                 |
| 1-stearoyl-2-oleoyl-GPE (18:0/18:1)                    | X                                | X                                                 |
| 1-stearoyl-GPG (18:0)                                  | X                                | X                                                 |
| 1,5-anhydroglucitol (1,5-AG)                           | X                                | X                                                 |
| 11-ketoetiocholanolone glucuronide                     |                                  | X                                                 |
| 11beta-hydroxyandrosterone glucuronide                 | X                                | X                                                 |

|                                                      |   |   |
|------------------------------------------------------|---|---|
| 11beta-hydroxyetiocholanolone glucuronide*           |   | X |
| 2-aminoadipate                                       |   | X |
| 2-aminoheptanoate                                    |   | X |
| 2-hydroxy-3-methylvalerate                           | X | X |
| 2-hydroxy-4-(methylthio)butanoic acid                |   | X |
| 2-hydroxybutyrate/2-hydroxyisobutyrate               | X | X |
| 2-oxoarginine*                                       |   | X |
| 2-stearoyl-GPE (18:0)*                               |   | X |
| 2,3-dihydroxy-2-methylbutyrate                       | X | X |
| 2,3-dihydroxy-5-methylthio-4-pentenoate (DMTPA)*     |   | X |
| 3-carboxy-4-methyl-5-propyl-2-furanpropanoate (CMPF) | X |   |
| 3-hydroxyadipate                                     |   | X |
| 3-hydroxydodecanedioate*                             | X |   |
| 3-hydroxyhexanoylcarnitine (1)                       | X |   |
| 3-hydroxymyristate                                   | X | X |
| 3-hydroxysebacate                                    |   | X |
| 3-indoxyl sulfate                                    |   | X |
| 3-methyladipate                                      |   | X |
| 3-methylglutaconate                                  |   | X |
| 3-methylglutaryl carnitine (2)                       | X | X |
| 3,4-dihydroxybutyrate                                |   | X |
| 4-acetamidobutanoate                                 |   | X |
| 4-hydroxyphenylacetate                               | X | X |
| 4-hydroxyphenylacetyl carnitine                      | X | X |
| 4-hydroxyphenylacetyl glutamine                      | X | X |
| 5alpha-androstan-3alpha,17beta-diol disulfate        |   | X |
| 5alpha-androstan-3alpha,17beta-diol monosulfate (2)  |   | X |
| 5alpha-androstan-3beta,17beta-diol disulfate         |   | X |
| 5alpha-pregnan-3beta-ol,20-one sulfate               |   | X |
| 5alpha-pregnan-3beta,20alpha-diol disulfate          | X | X |
| 5alpha-pregnan-3beta,20alpha-diol monosulfate (2)    | X | X |
| 5alpha-pregnan-3beta,20beta-diol monosulfate (1)     | X | X |
| 5alpha-pregnan-diol disulfate                        | X | X |
| 7-ketodeoxycholate                                   | X | X |
| 8-methoxykynurenate                                  |   | X |
| acisoga                                              | X | X |
| adrenate (22:4n6)                                    | X | X |
| alpha-hydroxycaproate                                |   | X |
| alpha-hydroxyisovalerate                             | X | X |
| alpha-ketobutyrate                                   | X | X |

|                                                                     |   |   |
|---------------------------------------------------------------------|---|---|
| androstenediol (3alpha, 17alpha) monosulfate (2)                    | X | X |
| androstenediol (3beta,17beta) disulfate (1)                         |   | X |
| androsterone glucuronide                                            | X | X |
| arabitol/xylitol                                                    |   | X |
| arabonate/xylonate                                                  | X | X |
| arachidonoylcholine                                                 | X | X |
| ascorbic acid 3-sulfate*                                            | X | X |
| beta-citrylglutamate                                                | X | X |
| beta-cryptoxanthin                                                  | X | X |
| branched-chain, straight-chain, or cyclopropyl 10:1 fatty acid (1)* |   | X |
| campesterol                                                         | X |   |
| carnitine of C10H14O2 (5)*                                          | X | X |
| ceramide (d16:1/24:1, d18:1/22:1)*                                  |   | X |
| chenodeoxycholate                                                   | X | X |
| chenodeoxycholic acid 24-glucuronide                                |   | X |
| chenodeoxycholic acid sulfate (1)                                   | X | X |
| cholate                                                             | X | X |
| cholic acid glucuronide                                             | X | X |
| cyclo(leu-pro)                                                      | X | X |
| cystathionine                                                       | X | X |
| cysteine-glutathione disulfide                                      | X | X |
| cytosine                                                            |   | X |
| deoxycholate                                                        | X | X |
| deoxycholic acid 12-sulfate*                                        | X | X |
| deoxycholic acid glucuronide                                        | X | X |
| diacylglycerol (12:0/18:1, 14:0/16:1, 16:0/14:1) [2]*               | X | X |
| diacylglycerol (14:0/18:1, 16:0/16:1) [1]*                          | X | X |
| diacylglycerol (14:0/18:1, 16:0/16:1) [2]*                          | X | X |
| diacylglycerol (16:1/18:2 [2], 16:0/18:3 [1])*                      | X | X |
| dihomo-linolenoyl-choline                                           | X | X |
| docosahexaenoylcholine                                              | X | X |
| docosapentaenoate (n3 DPA; 22:5n3)                                  | X | X |
| docosatrienoate (22:3n6)*                                           | X | X |
| dopamine 3-O-sulfate                                                |   | X |
| dopamine 4-sulfate                                                  | X | X |
| eicosapentaenoylcholine                                             |   | X |
| eicosenedioate (C20:1-DC)*                                          |   | X |
| erucate (22:1n9)                                                    |   | X |
| erythronate*                                                        |   | X |
| estrone 3-sulfate                                                   |   | X |

|                                                                           |   |   |
|---------------------------------------------------------------------------|---|---|
| formiminoglutamate                                                        | X | X |
| fructose                                                                  | X | X |
| fructosyllysine                                                           | X | X |
| galactonate                                                               |   | X |
| gamma-CEHC glucuronide*                                                   |   | X |
| gamma-glutamylglutamate                                                   |   | X |
| gamma-glutamylisoleucine*                                                 |   | X |
| gamma-glutamylvaline                                                      |   | X |
| gamma-tocopherol/beta-tocopherol                                          | X | X |
| gentisate                                                                 |   | X |
| glucose                                                                   | X | X |
| glucuronate                                                               |   | X |
| glucuronide of C <sub>14</sub> H <sub>22</sub> O <sub>4</sub> (2)*        | X | X |
| glutamate                                                                 |   | X |
| glutamine conjugate of C <sub>6</sub> H <sub>10</sub> O <sub>2</sub> (1)* | X | X |
| glutamine conjugate of C <sub>6</sub> H <sub>10</sub> O <sub>2</sub> (2)* | X | X |
| glutamine conjugate of C <sub>7</sub> H <sub>12</sub> O <sub>2</sub> *    | X | X |
| glutarate (C5-DC)                                                         | X | X |
| glycodeoxycholate                                                         | X |   |
| glycolithocholate sulfate*                                                |   | X |
| glycosyl ceramide (d18:1/23:1, d17:1/24:1)*                               |   | X |
| glycosyl ceramide (d18:2/24:1, d18:1/24:2)*                               |   | X |
| glycoursodeoxycholic acid sulfate (1)                                     | X | X |
| guanidinosuccinate                                                        | X | X |
| gulonate*                                                                 | X | X |
| heneicosapentaenoate (21:5n3)                                             | X | X |
| hexanoylglutamine                                                         | X | X |
| homocitrulline                                                            | X | X |
| hydantoin-5-propionate                                                    | X | X |
| hydroxy-CMPF*                                                             | X | X |
| hydroxy-N6,N6,N6-trimethyllysine*                                         |   | X |
| l-urobilinogen                                                            | X | X |
| imidazole propionate                                                      | X | X |
| indoleacetylglutamine                                                     | X | X |
| indolepropionate                                                          | X |   |
| isoursodeoxycholate                                                       | X | X |
| isoursodeoxycholate sulfate (1)                                           | X | X |
| L-urobilin                                                                |   | X |
| lactate                                                                   |   | X |
| lactose                                                                   | X | X |
| lanthionine                                                               |   | X |



|                                                     |   |   |
|-----------------------------------------------------|---|---|
| linoleoyl-arachidonoyl-glycerol (18:2/20:4) [1]*    | X | X |
| linoleoyl-arachidonoyl-glycerol (18:2/20:4) [2]*    | X | X |
| linoleoyl-docosahexaenoyl-glycerol (18:2/22:6) [1]* | X | X |
| linoleoyl-linolenoyl-glycerol (18:2/18:3) [1]*      | X | X |
| linoleoyl-linoleoyl-glycerol (18:2/18:2) [1]*       | X | X |
| linoleoyl-linoleoyl-glycerol (18:2/18:2) [2]*       |   | X |
| linoleoylcholine*                                   | X | X |
| lithocholate sulfate (1)                            | X | X |
| lyxonate                                            | X | X |
| maleate                                             |   | X |
| maltose                                             | X | X |
| mannose                                             | X | X |
| margarate (17:0)                                    | X | X |
| methionine sulfone                                  | X | X |
| methylsuccinoylcarnitine                            |   | X |
| myristoyl-linoleoyl-glycerol (14:0/18:2) [1]*       | X | X |
| myristoyl-linoleoyl-glycerol (14:0/18:2) [2]*       | X | X |
| N-acetyl-1-methylhistidine*                         |   | X |
| N-acetyl-cadaverine                                 | X | X |
| N-acetylcitrulline                                  |   | X |
| N-acetylhomocitrulline                              |   | X |
| N-acetylleucine                                     | X |   |
| N-acetylneuraminate                                 |   | X |
| N-acetyltaurine                                     |   | X |
| N-carbamoylalanine                                  |   | X |
| N-carbamoylvaline                                   |   | X |
| N-methylproline                                     | X | X |
| N-stearoyl-sphinganine (d18:0/18:0)*                | X | X |
| N-stearoyl-sphingosine (d18:1/18:0)*                |   | X |
| N-stearoylserine*                                   | X | X |
| N,N-dimethylalanine                                 | X | X |
| N,N,N-trimethyl-5-aminovalerate                     | X | X |
| N2-acetyl,N6,N6-dimethyllysine                      |   | X |
| N2,N5-diacetylornithine                             | X | X |
| N6-succinyladenosine                                |   | X |
| nisinate (24:6n3)                                   |   | X |
| oleoyl-arachidonoyl-glycerol (18:1/20:4) [1]*       | X | X |
| oleoyl-arachidonoyl-glycerol (18:1/20:4) [2]*       | X | X |
| oleoyl-linoleoyl-glycerol (18:1/18:2) [1]           | X | X |
| oleoyl-linoleoyl-glycerol (18:1/18:2) [2]           | X | X |
| oleoyl-oleoyl-glycerol (18:1/18:1) [1]*             | X | X |

|                                                                          |   |   |
|--------------------------------------------------------------------------|---|---|
| oleoyl-oleoyl-glycerol (18:1/18:1) [2]*                                  | X | X |
| oleoylcholine                                                            | X | X |
| orotidine                                                                | X | X |
| p-cresol glucuronide*                                                    | X | X |
| palmitoleoyl-arachidonoyl-glycerol (16:1/20:4) [2]*                      | X | X |
| palmitoleoyl-linoleoyl-glycerol (16:1/18:2) [1]*                         | X | X |
| palmitoleoyl-oleoyl-glycerol (16:1/18:1) [1]*                            |   | X |
| palmitoleoyl-oleoyl-glycerol (16:1/18:1) [2]*                            | X | X |
| palmitoloelycholine                                                      | X | X |
| palmitoyl-arachidonoyl-glycerol (16:0/20:4) [1]*                         | X | X |
| palmitoyl-arachidonoyl-glycerol (16:0/20:4) [2]*                         | X | X |
| palmitoyl-docosahexaenoyl-glycerol (16:0/22:6) [1]*                      | X | X |
| palmitoyl-linoleoyl-glycerol (16:0/18:2) [1]*                            | X | X |
| palmitoyl-linoleoyl-glycerol (16:0/18:2) [2]*                            | X | X |
| palmitoyl-oleoyl-glycerol (16:0/18:1) [1]*                               | X | X |
| palmitoyl-oleoyl-glycerol (16:0/18:1) [2]*                               | X | X |
| palmitoylcholine                                                         | X | X |
| pentose acid*                                                            |   | X |
| phenol glucuronide                                                       | X | X |
| phenol sulfate                                                           | X | X |
| phenylacetylcarnitine                                                    |   | X |
| phenylacetylglutamate                                                    | X | X |
| phenylacetylglutamine                                                    |   | X |
| picolinoylglycine                                                        | X | X |
| pipecolate                                                               |   | X |
| pregnanediol-3-glucuronide                                               | X | X |
| pregnanolone/allopregnanolone sulfate                                    | X | X |
| pregnenediol sulfate (C <sub>21</sub> H <sub>34</sub> O <sub>5</sub> S)* | X | X |
| pregnenolone sulfate                                                     | X | X |
| prolylglycine                                                            | X | X |
| pyridoxate                                                               |   | X |
| pyruvate                                                                 | X | X |
| ribitol                                                                  | X |   |
| ribonate                                                                 | X | X |
| sphingomyelin (d18:1/20:2, d18:2/20:1, d16:1/22:2)*                      |   | X |
| sphingomyelin (d18:1/22:2, d18:2/22:1, d16:1/24:2)*                      |   | X |
| sphingomyelin (d18:2/14:0, d18:1/14:1)*                                  |   | X |
| sphingomyelin (d18:2/18:1)*                                              |   | X |
| sphingomyelin (d18:2/24:2)*                                              |   | X |
| stearoyl-arachidonoyl-glycerol (18:0/20:4) [1]*                          |   | X |
| stearoylcholine*                                                         | X | X |

|                                     |   |   |
|-------------------------------------|---|---|
| succinylcarnitine (C4-DC)           |   | X |
| sucrose                             | X | X |
| taurocholate sulfate*               | X | X |
| taurodeoxycholic acid 3-sulfate     | X |   |
| taurothiocholate 3-sulfate          | X | X |
| tetrahydrocortisol glucuronide      | X | X |
| tetrahydrocortisol sulfate (1)      |   | X |
| tetrahydrocortisone glucuronide (5) |   | X |
| trigonelline (N'-methylnicotinate)  | X | X |
| trimethylamine N-oxide              | X | X |
| tryptophan betaine                  | X | X |
| tyramine O-sulfate                  | X | X |
| ursodeoxycholate                    | X | X |
| vanillactate                        |   | X |
| xanthosine                          |   | X |
| xylose                              | X | X |

The liver gene expression with significant differences between the cardiometabolic and liver-specific clusters (A), cardiometabolic and control clusters (B), and liver-specific and control clusters (C). Gene expression differential analysis across clusters was conducted using two-sided moderated t-tests. Statistical significance was assigned to differences where p-values, adjusted for multiple comparisons using the Benjamini-Hochberg method to control the False Discovery Rate, were below 0.05 and the absolute value of log<sub>2</sub> fold change was greater than 0.26.

Metabolites with significant differences between the cardiometabolic and liver-specific clusters (D), cardiometabolic and control clusters (E), and liver-specific and control clusters (F). Metabolite differential analysis across clusters was conducted using moderated t-tests, excluding xenobiotics. Statistical significance was assigned to differences where p-values, adjusted for multiple comparisons using the Benjamini-Hochberg method to control the False Discovery Rate, were below 0.05 and the absolute value of log<sub>2</sub> fold change was greater than 0.26.

**Supplementary Table 2: Definition of self-reported history of liver disease, cardiovascular disease, and type 2 diabetes (UK Biobank data-field 20002) and ICD-10 codes used to define liver disease, cardiovascular disease, and type 2 diabetes.**

| Liver disease                                 |      |                                                                  |       |
|-----------------------------------------------|------|------------------------------------------------------------------|-------|
| Self reported history                         |      | ICD-10 codes                                                     |       |
| Description                                   | Code | Diagnosis                                                        | Code  |
| liver/biliary/pancreas problem                | 1136 | Chronic viral hepatitis                                          | B18   |
| oesophageal varices                           | 1141 | Unspecified viral hepatitis                                      | B19   |
| hepatitis                                     | 1155 | Liver cell carcinoma                                             | C22.0 |
| infective/viral hepatitis                     | 1156 | Disorders of copper metabolism                                   | E83.0 |
| non-infective hepatitis                       | 1157 | Disorders of iron metabolism                                     | E83.1 |
| liver failure/cirrhosis                       | 1158 | Disorders of plasma-protein metabolism, not elsewhere classified | E88.0 |
| bile duct disease                             | 1159 | Budd-Chiari syndrome                                             | I82.0 |
| alcohol dependency                            | 1408 | Oesophageal varices with bleeding                                | I85.0 |
| primary biliary cirrhosis                     | 1506 | Oesophageal varices without bleeding                             | I85.9 |
| haemochromatosis                              | 1507 | Alcoholic liver disease                                          | K70   |
| hepatitis a                                   | 1578 | Toxic liver disease                                              | K71   |
| hepatitis b                                   | 1579 | Chronic hepatic failure                                          | K72.1 |
| hepatitis c                                   | 1580 | Hepatic failure, unspecified                                     | K72.9 |
| hepatitis d                                   | 1581 | Chronic hepatitis, not elsewhere classified                      | K73   |
| hepatitis e                                   | 1582 | Hepatic fibrosis                                                 | K74.0 |
| alcoholic liver disease / alcoholic cirrhosis | 1604 | Hepatic sclerosis                                                | K74.1 |
| alpha-1 antitrypsin deficiency                | 1496 | Hepatic fibrosis with hepatic sclerosis                          | K74.2 |
| sclerosing cholangitis                        | 1475 | Primary biliary cirrhosis                                        | K74.3 |
|                                               |      | Secondary biliary cirrhosis                                      | K74.4 |
|                                               |      | Biliary cirrhosis, unspecified                                   | K74.5 |
|                                               |      | Other and unspecified cirrhosis of liver                         | K74.6 |
|                                               |      | Nonspecific reactive hepatitis                                   | K75.2 |
|                                               |      | Granulomatous hepatitis, not elsewhere classified                | K75.3 |
|                                               |      | Autoimmune hepatitis                                             | K75.4 |
|                                               |      | Other specified inflammatory liver diseases                      | K75.8 |
|                                               |      | Inflammatory liver disease, unspecified                          | K75.9 |

|                                    |      |                                                                     |        |
|------------------------------------|------|---------------------------------------------------------------------|--------|
|                                    |      | Fatty (change of) liver, not elsewhere classified                   | K76.0  |
|                                    |      | Hepatic veno-occlusive disease                                      | K76.5  |
|                                    |      | Portal hypertension                                                 | K76.6  |
|                                    |      | Hepatorenal syndrome                                                | K76.7  |
|                                    |      | Other specified diseases of liver                                   | K76.8  |
|                                    |      | Liver disease, unspecified                                          | K76.9  |
|                                    |      | Cholangitis                                                         | K83.0  |
|                                    |      | Ascites                                                             | R18    |
|                                    |      | Liver transplant status                                             | Z94.4  |
| <b>Cardio-vascular disease</b>     |      |                                                                     |        |
| Self reported history              |      | ICD-10 codes                                                        |        |
| Description                        | Code | Diagnosis                                                           | ICD-10 |
| angina                             | 1074 | Angina pectoris                                                     | I20    |
| heart attack/myocardial infarction | 1075 | Acute myocardial infarction                                         | I21    |
| stroke                             | 1081 | Subsequent myocardial infarction                                    | I22    |
| transient ischaemic attack (tia)   | 1082 | Certain current complications following acute myocardial infarction | I23    |
| ischaemic stroke                   | 1583 | Other acute ischaemic heart diseases                                | I24    |
|                                    |      | Chronic ischaemic heart disease                                     | I25    |
|                                    |      | Subarachnoid haemorrhage                                            | I60    |
|                                    |      | Intracerebral haemorrhage                                           | I61    |
|                                    |      | Other nontraumatic intracranial haemorrhage                         | I62    |
|                                    |      | Cerebral infarction                                                 | I63    |
|                                    |      | Stroke, not specified as haemorrhage or infarction                  | I64    |
|                                    |      | Sequelae of cerebrovascular disease                                 | I69    |
|                                    |      | Transient cerebral ischaemic attacks and related syndromes          | G45    |
| <b>Type 2 diabetes</b>             |      |                                                                     |        |
| Self reported history              |      | ICD-10 codes                                                        |        |
| Description                        | Code | Diagnosis                                                           | ICD-10 |
| diabetes                           | 1220 | Non-insulin-dependent diabetes mellitus                             | E11    |
| type 2 diabetes                    | 1223 | Unspecified diabetes mellitus                                       | E14    |
